# Supplementary material for: Ionizing Radiation Induces Resistant Glioblastoma Stem-Like Cells by Promoting Autophagy via the Wnt/β-Catenin Pathway
Source: MDPI journal article supplement (doi:10.3390/life11050451), 2021-05-18
Supplement: s1 [file s1]

Related to Fig.3D-1

Anti-P62

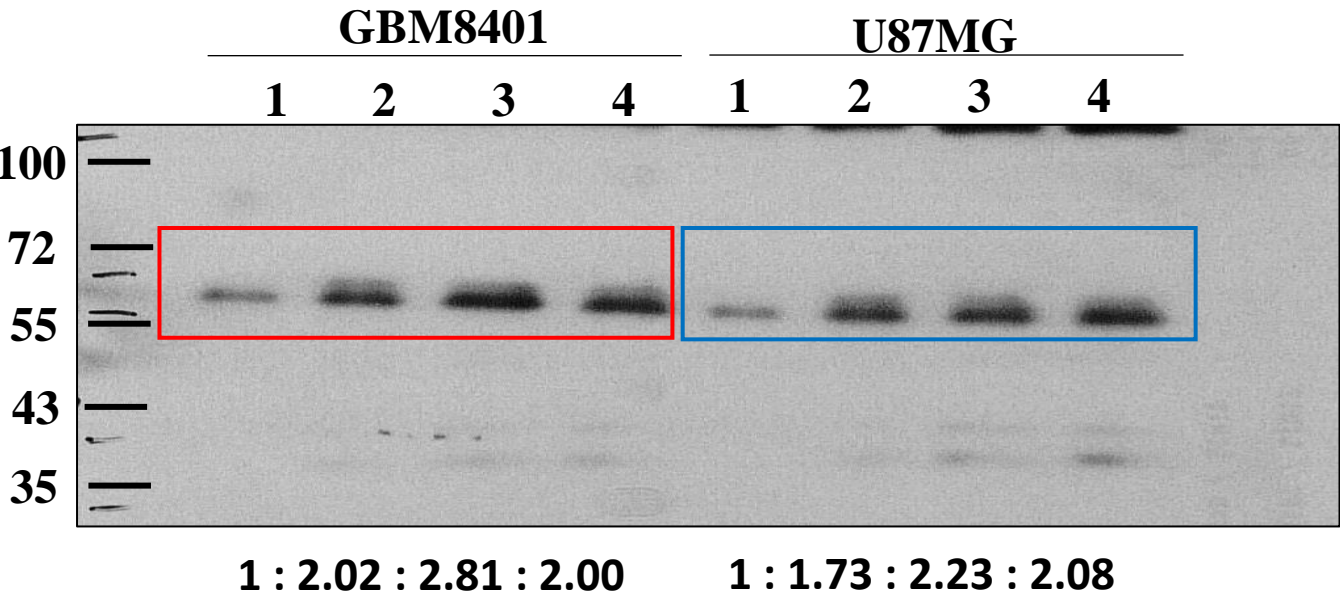

Anti-LC3 I/II

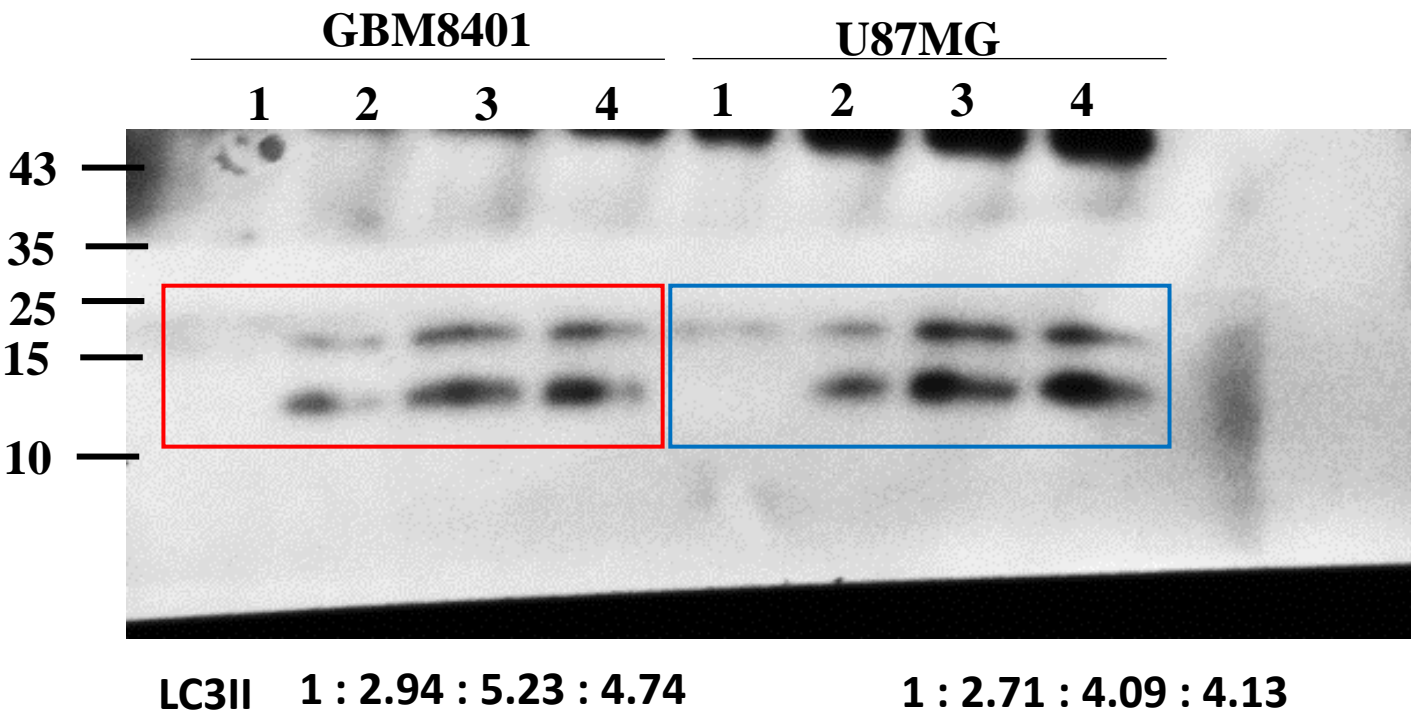

Anti-Nestin

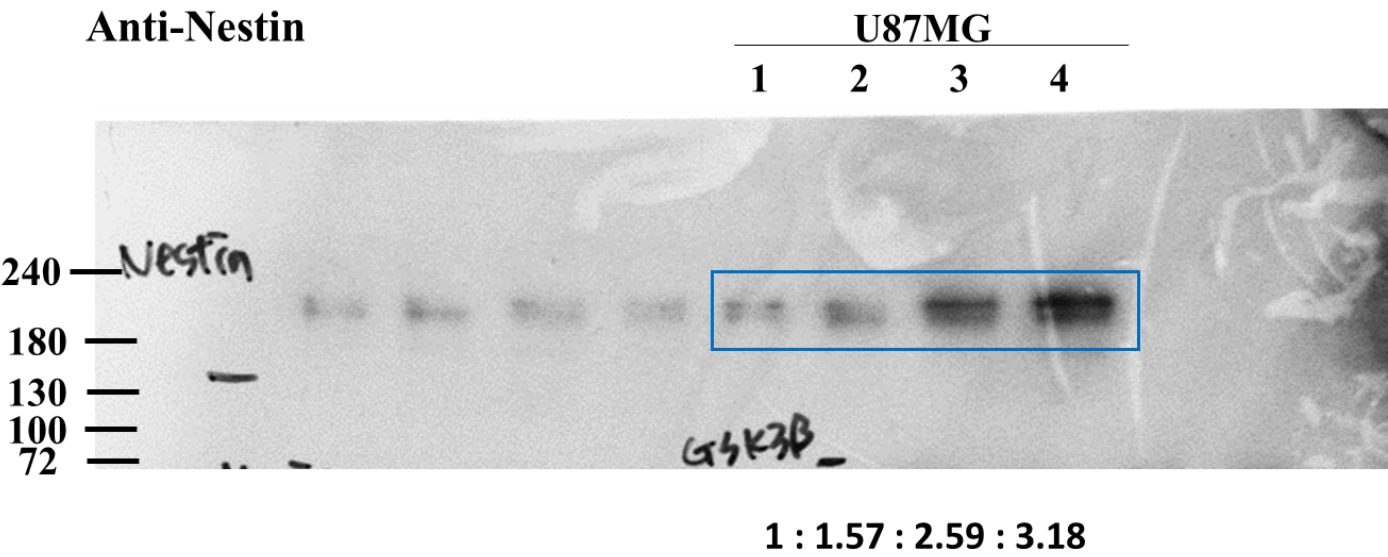

Related to Fig.3D-2

Anti-Nestin

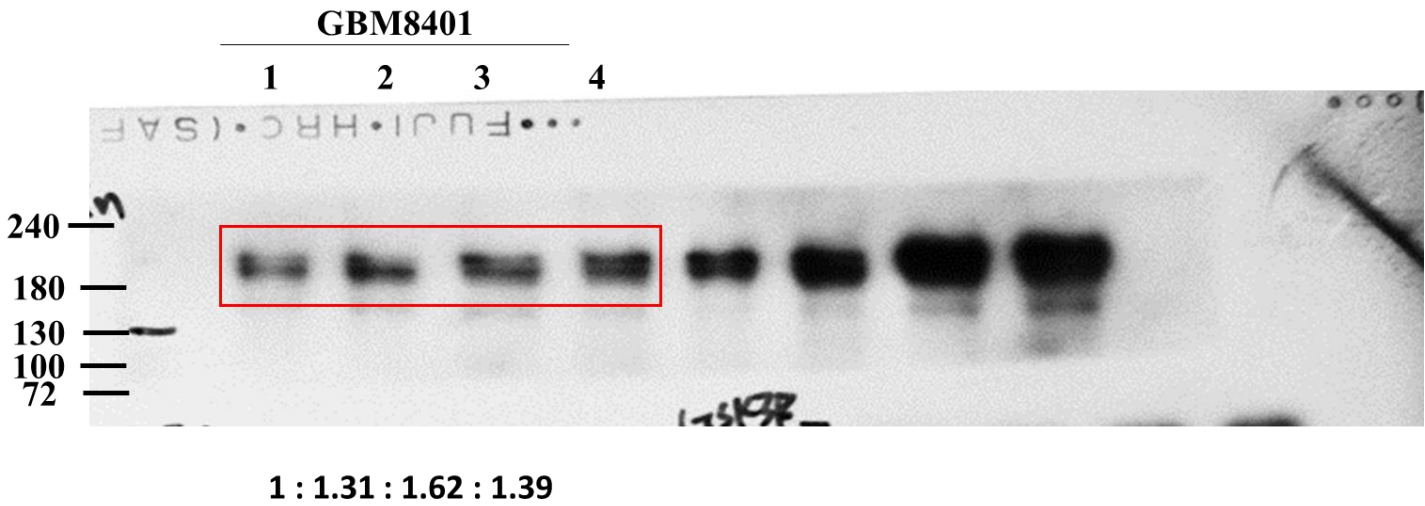

U87MG

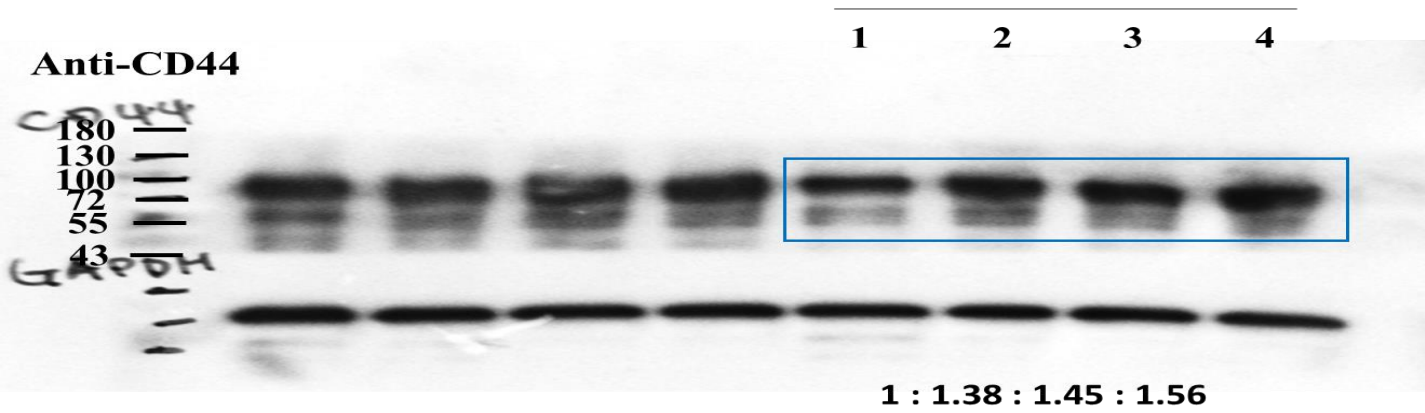

Anti-CD44

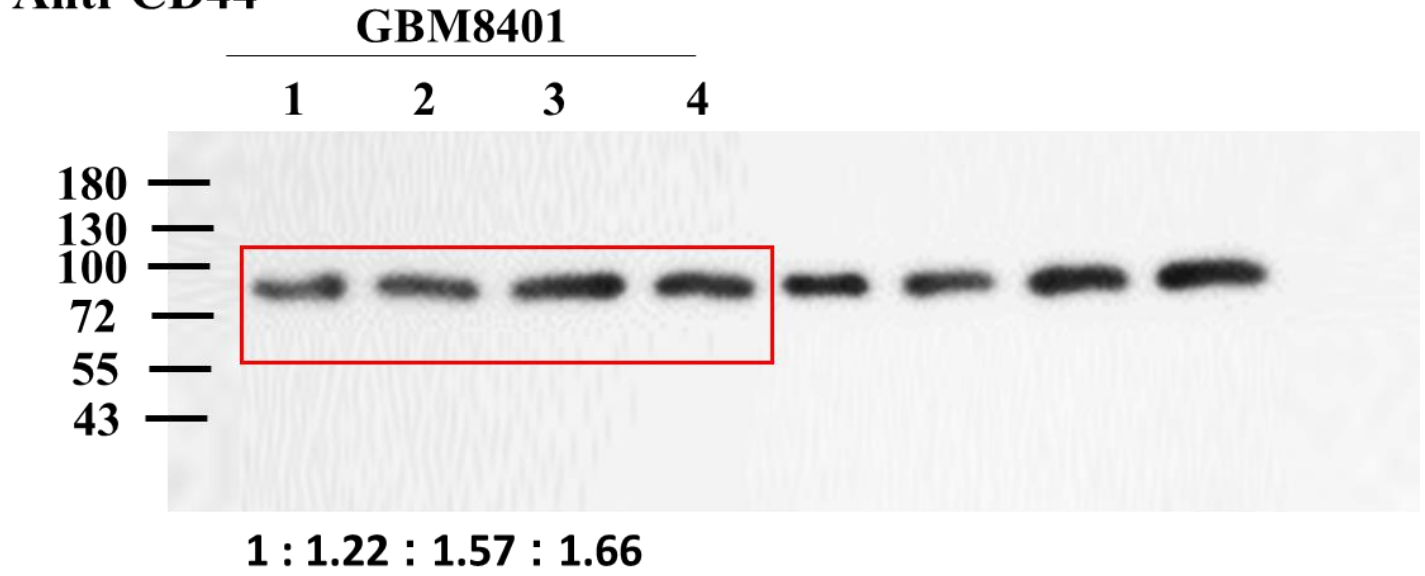

Related to Fig.3D-3

Anti-CD133

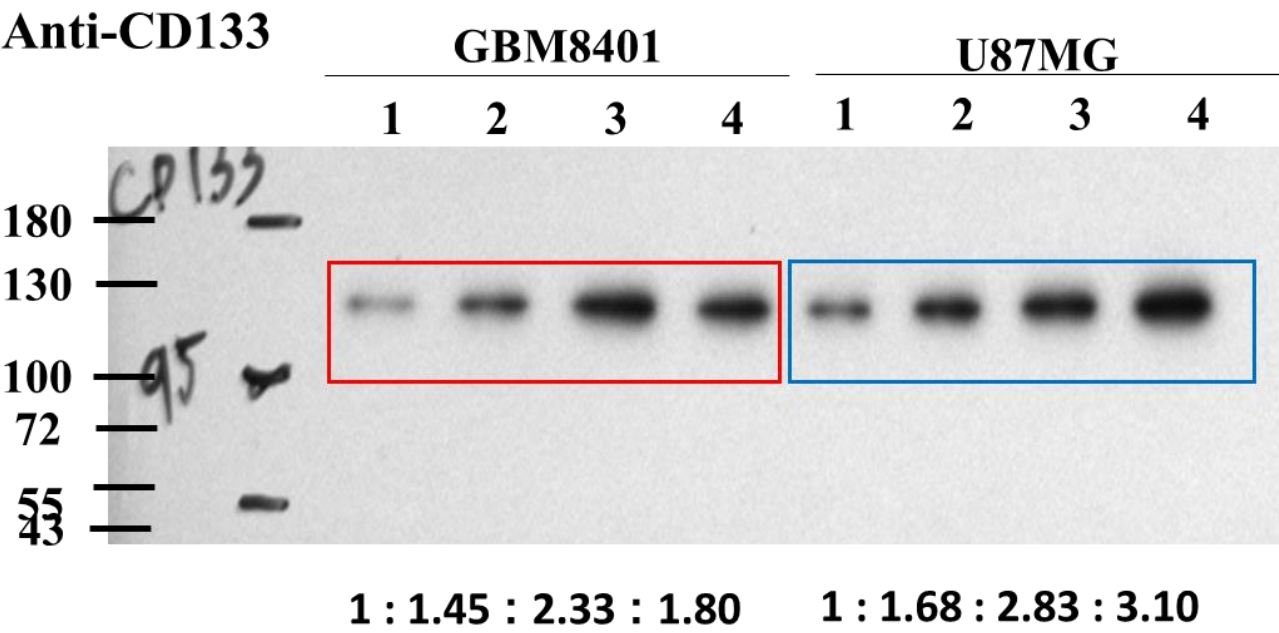

Anti-SOX2

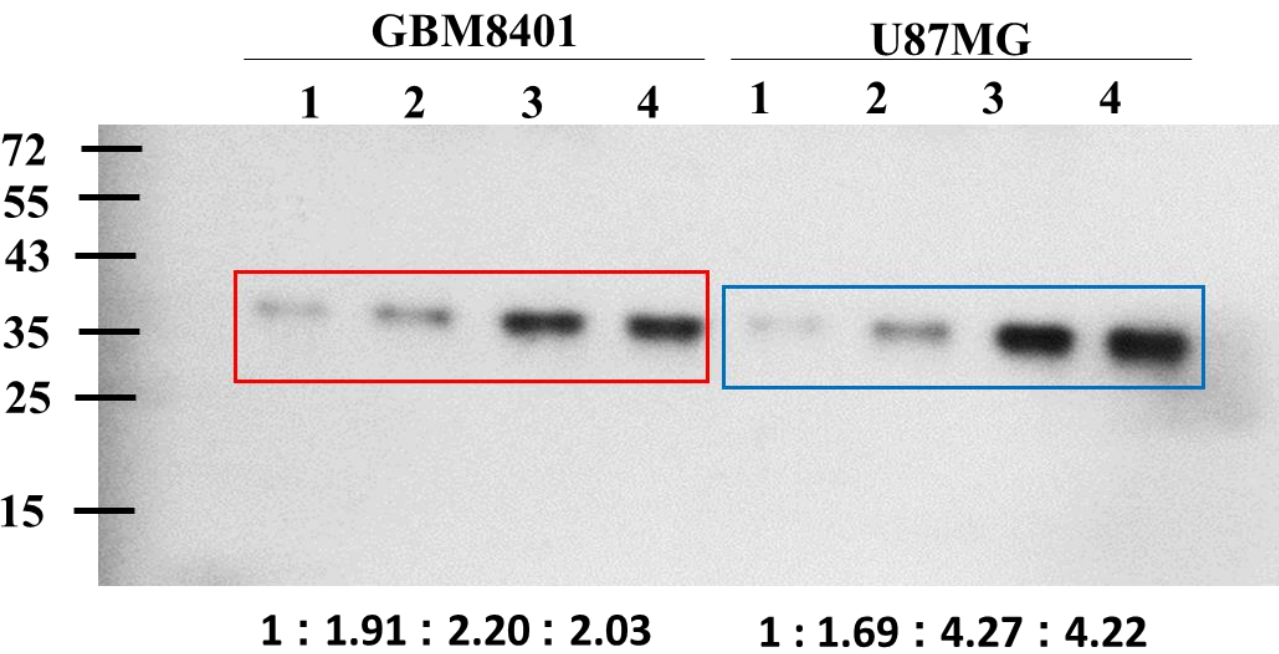

Anti-GAPDH

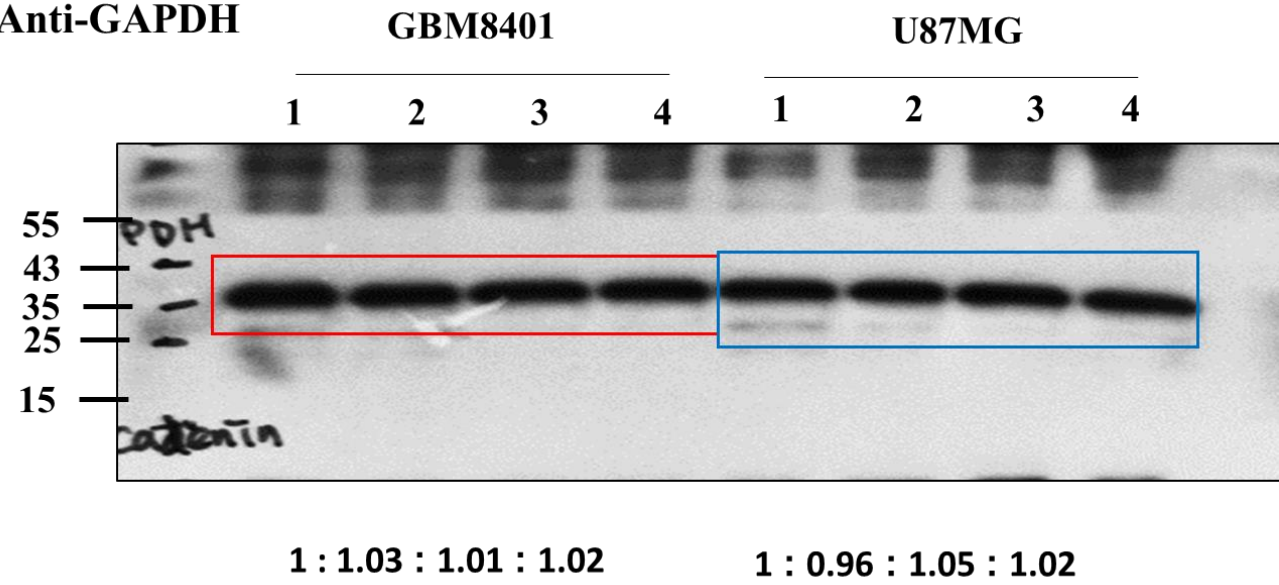



Related to Fig.4A-1

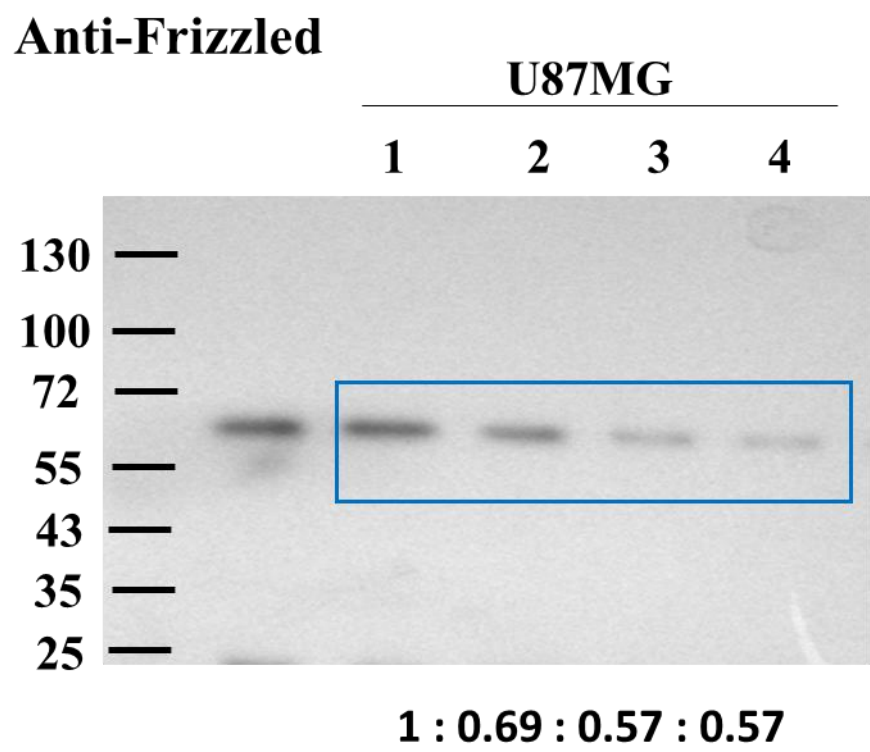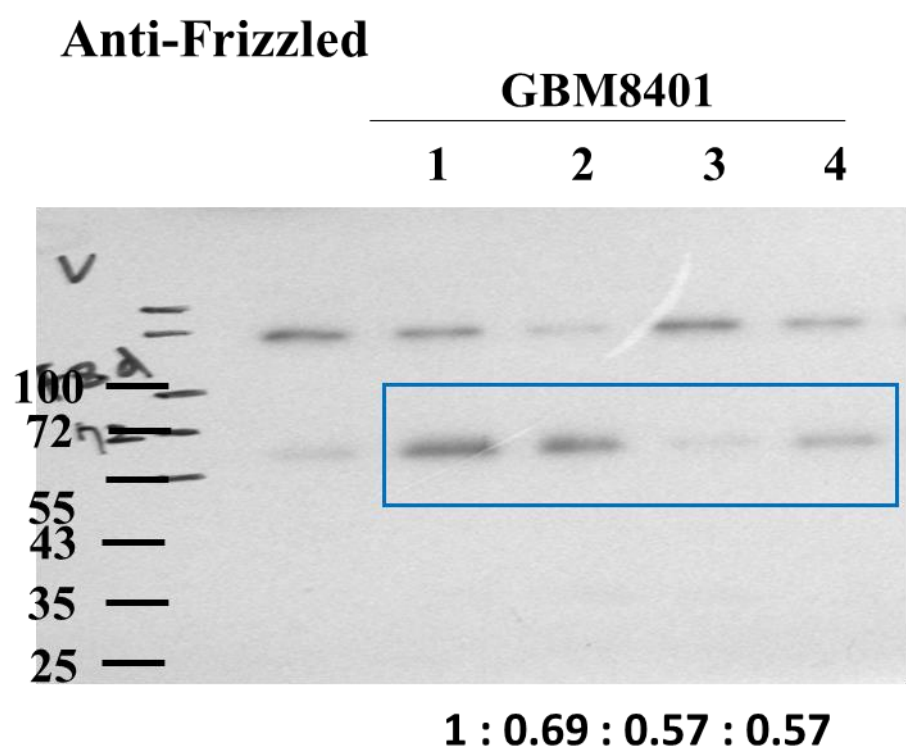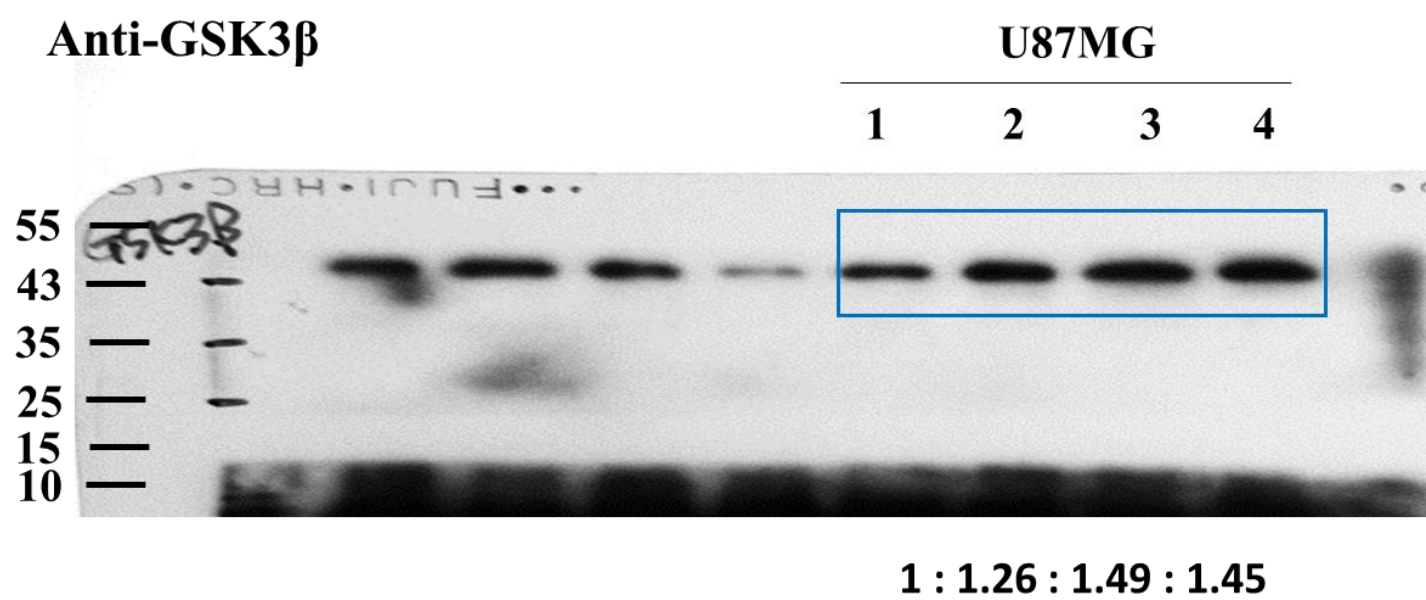

Related to Fig.4A-2

Anti-GSK3β

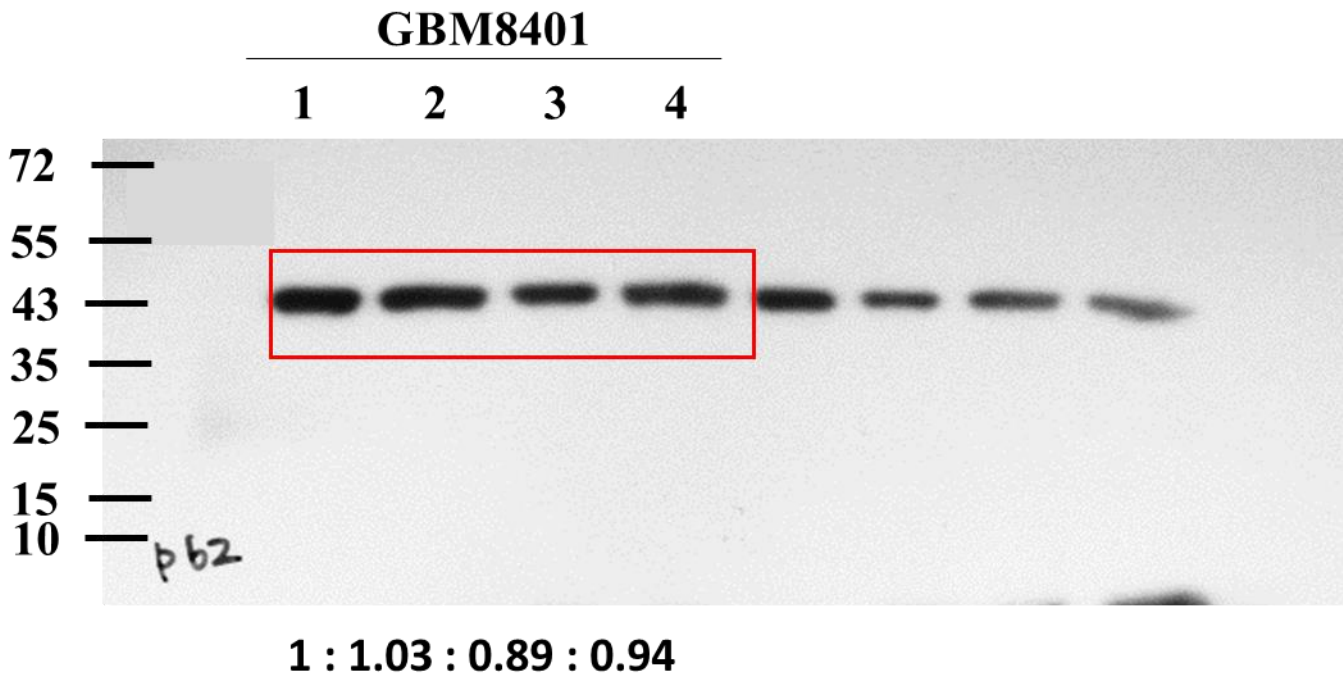

Anti-GSK3β (S9)

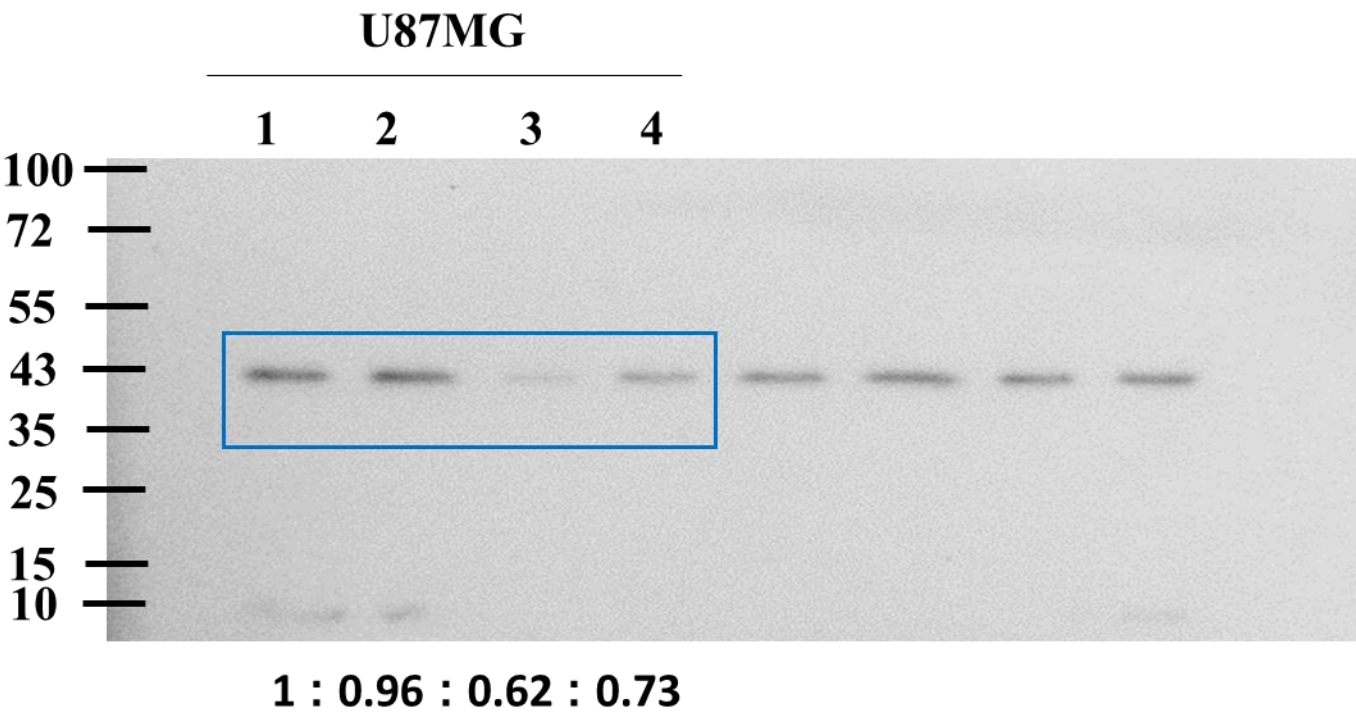

Anti-GSK3β (S9)

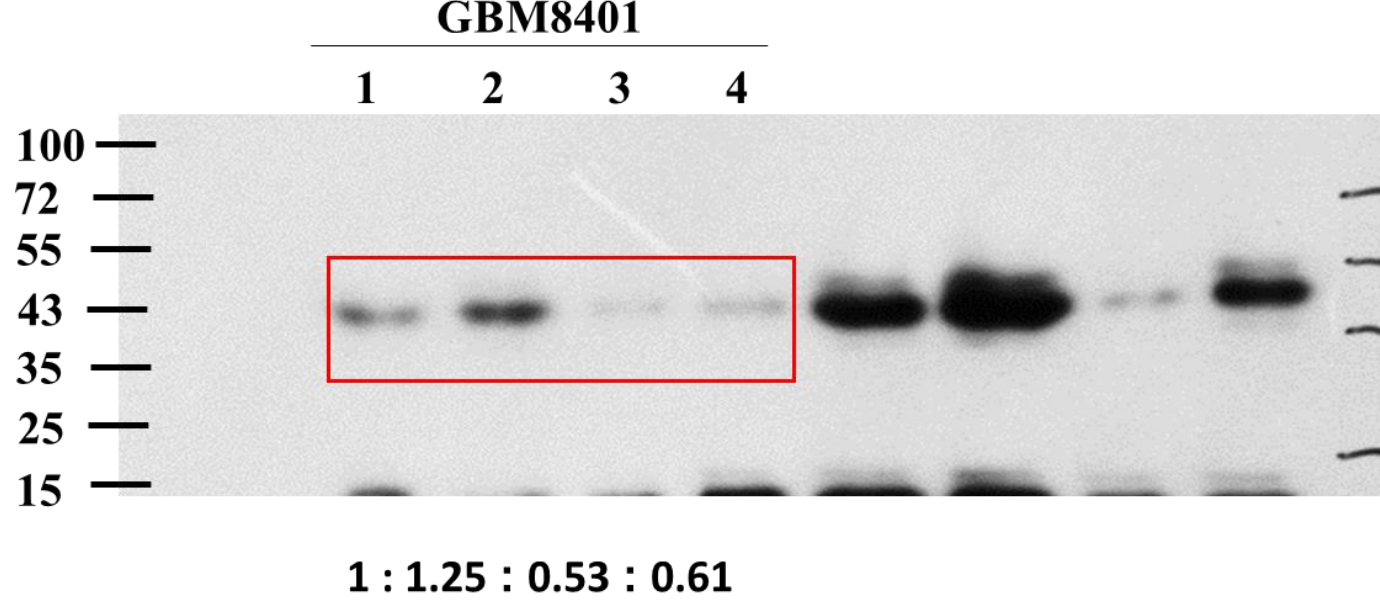

Related to Fig.4A-3

Anti-β-catenin

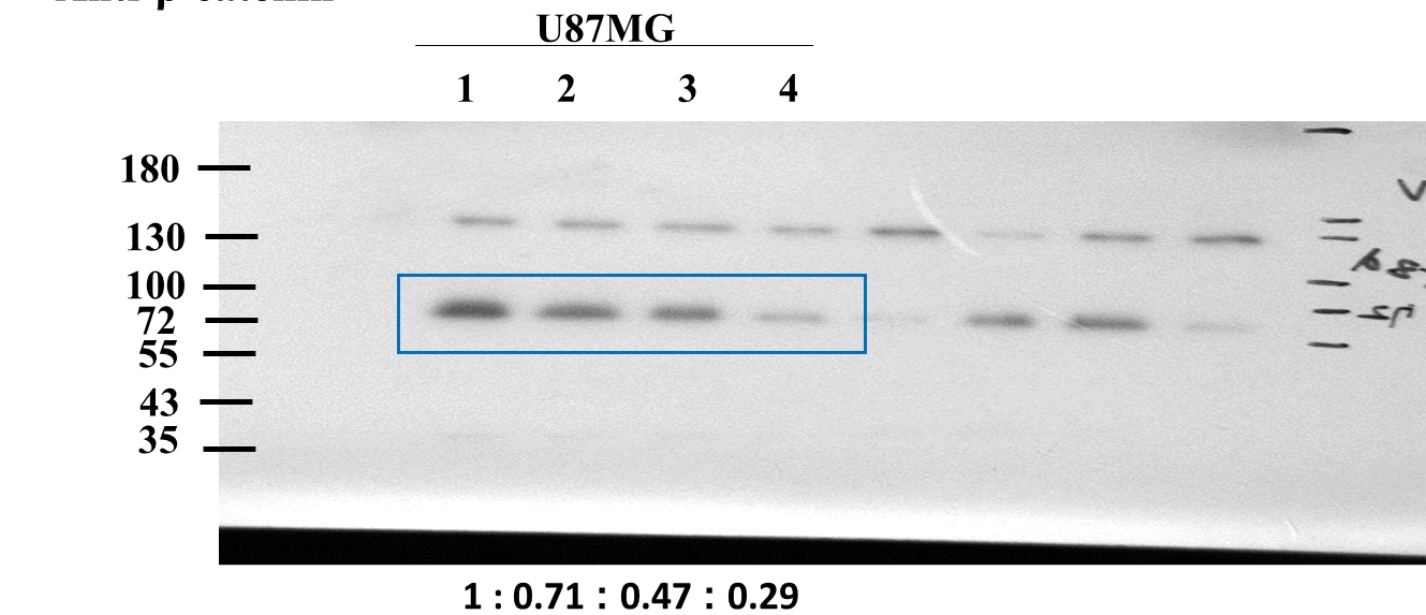

Anti- β-catenin

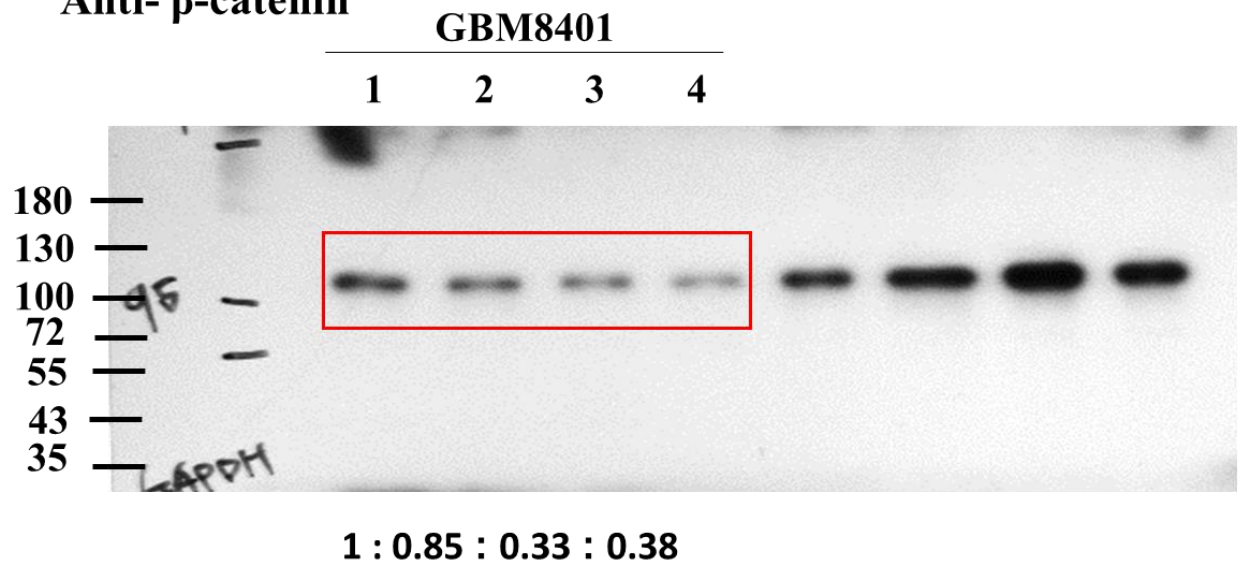

Anti-β-catenin (S33/37/41)

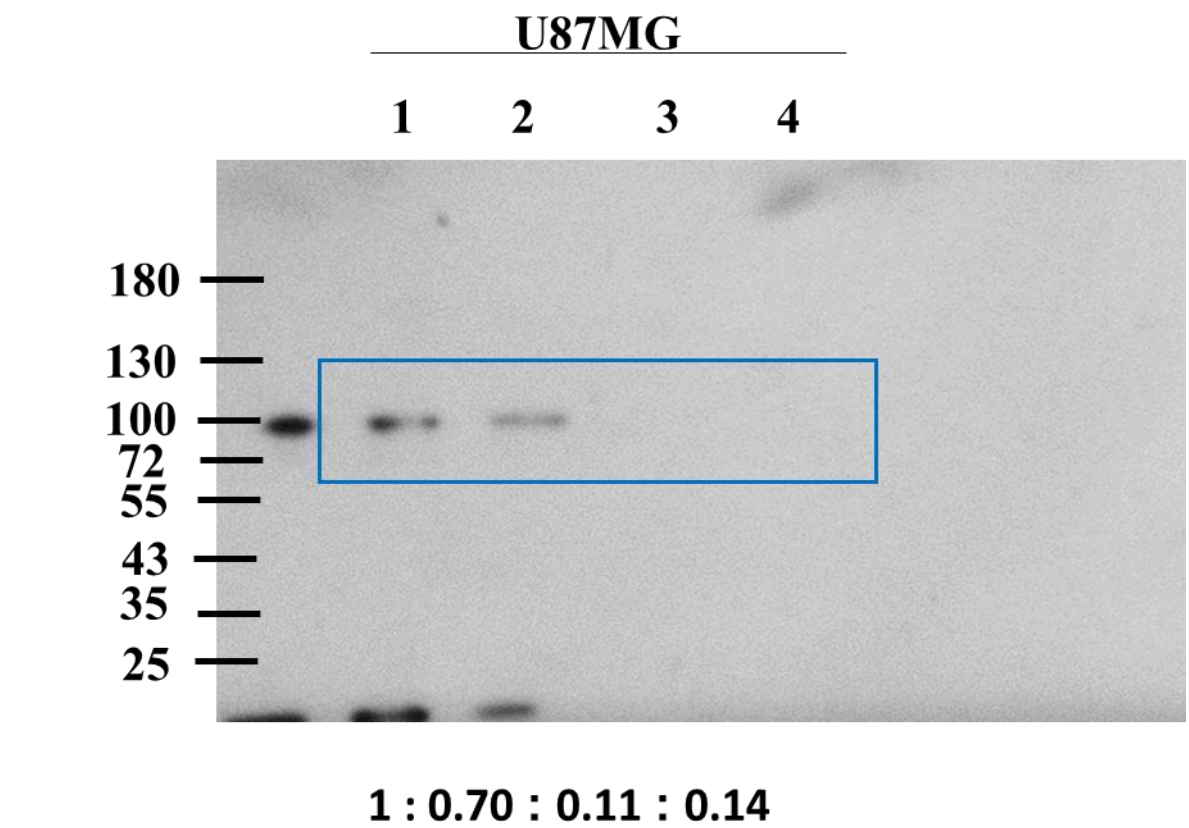



Related to Fig.4A-4

Anti-β-catenin (S33/37/41)

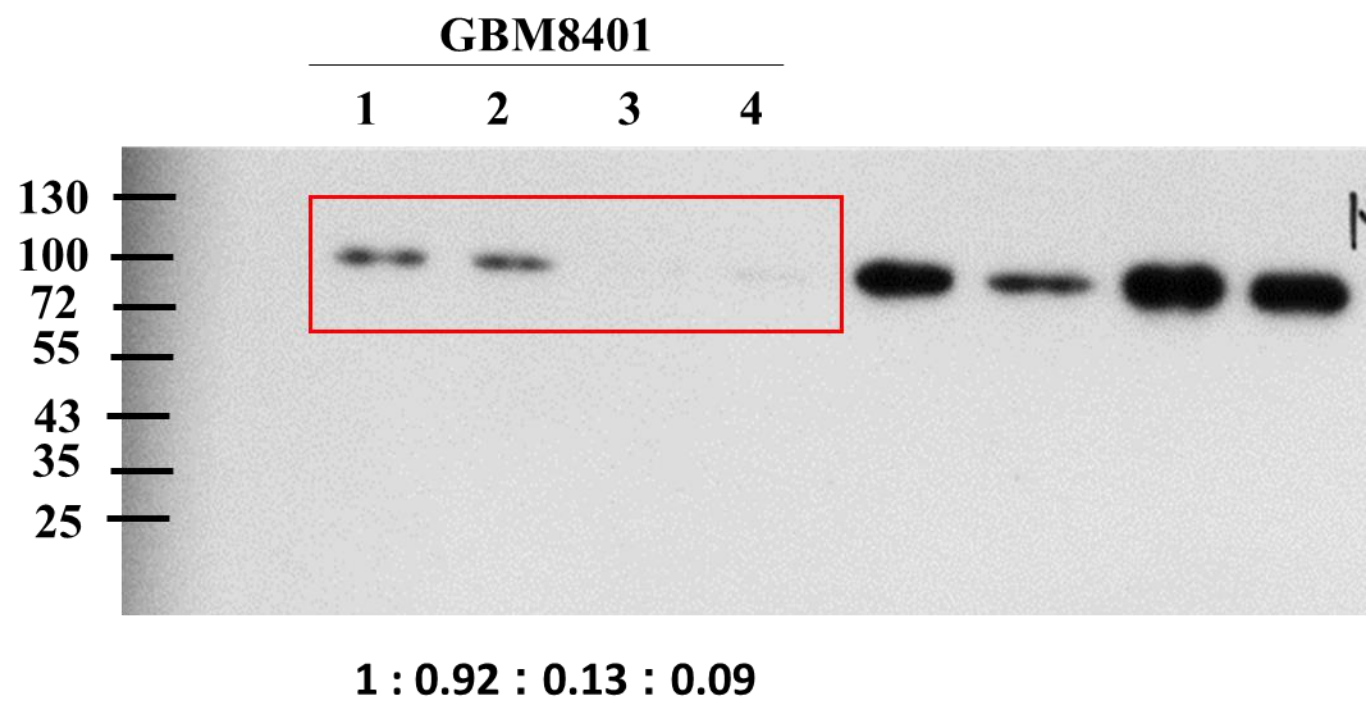

Anti-GAPDH

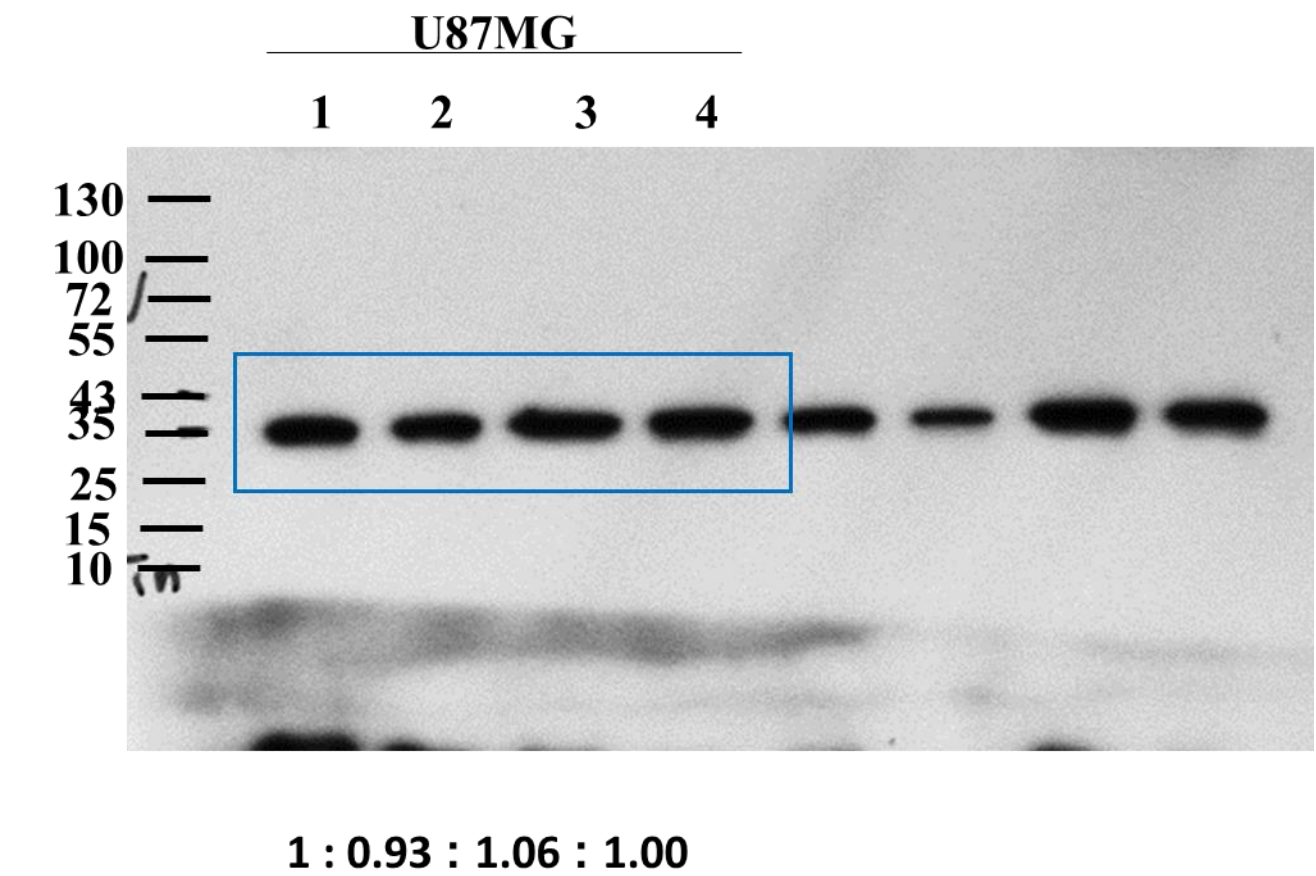

Related to Fig.4A-5

Anti-GAPDH

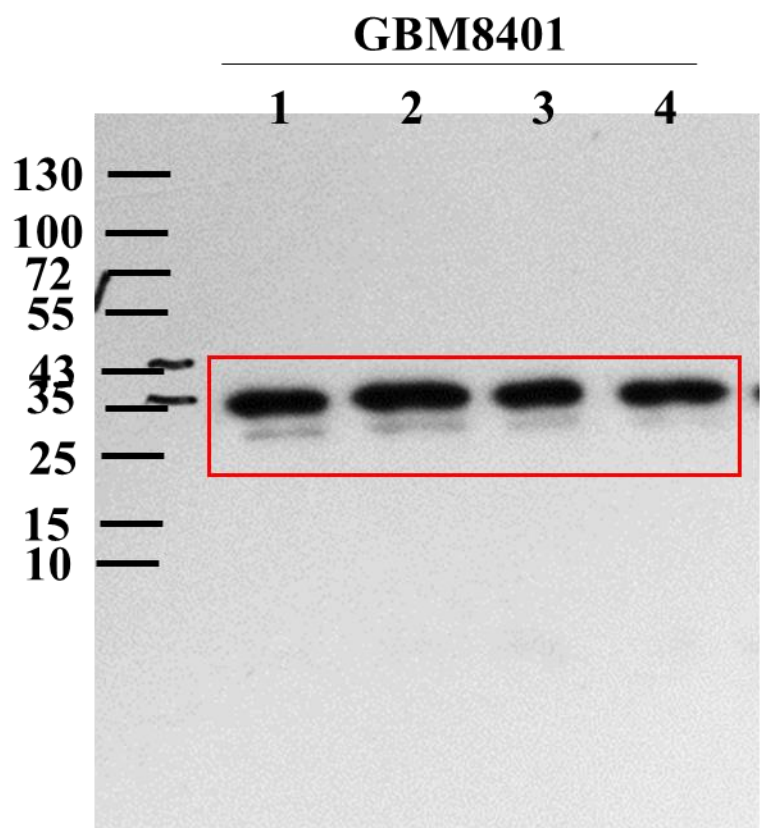

1 : 0.92 : 0.92 : 0.98



Related to Fig.4B-1

Anti-β-catenin

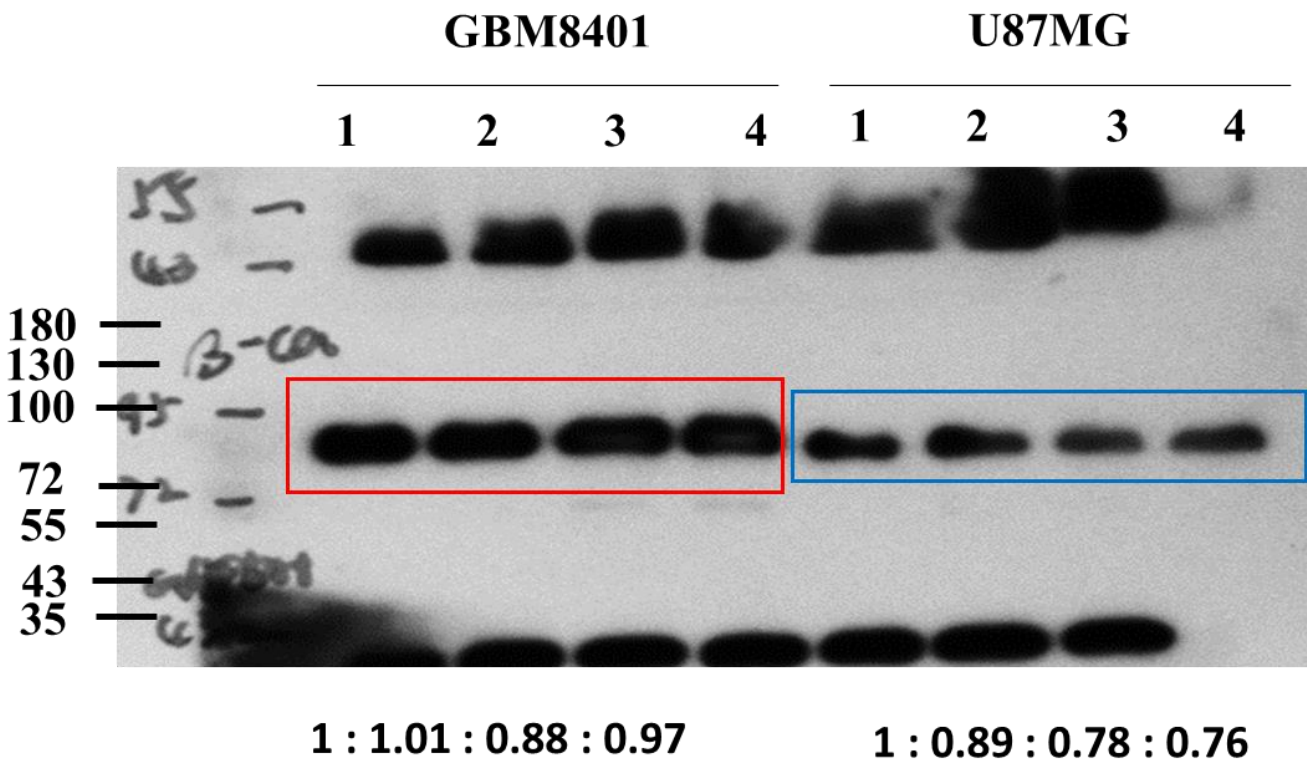

Anti-β-catenin (S33/37/41)

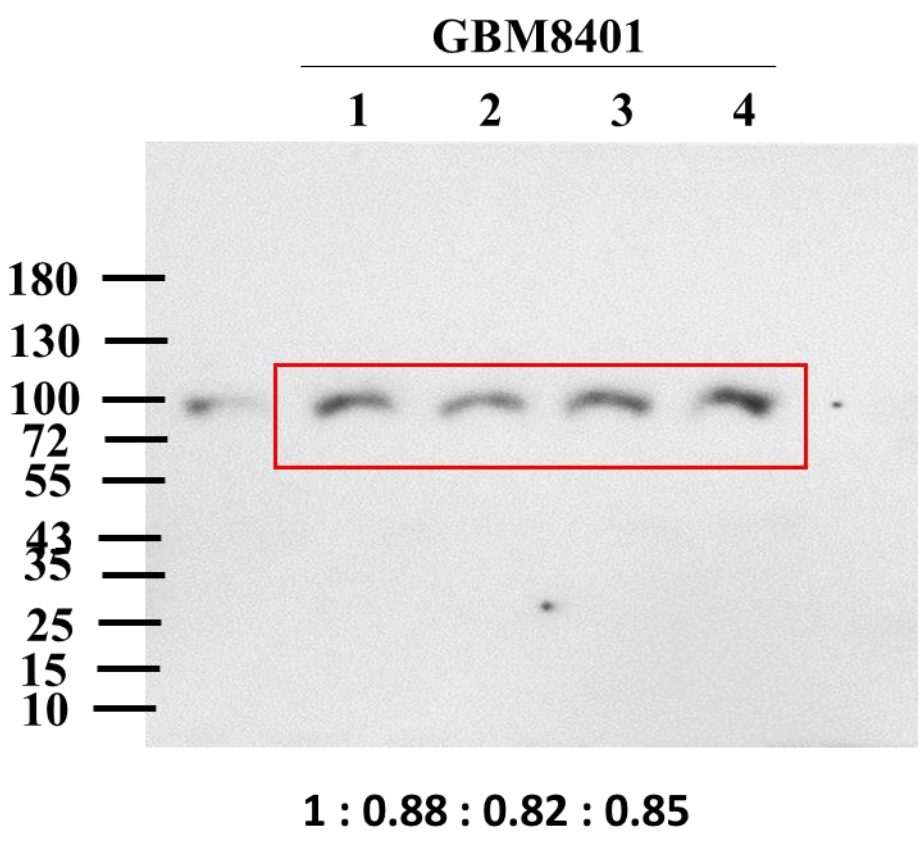

Related to Fig.4B-2

Anti-β-catenin (S33/37/41)

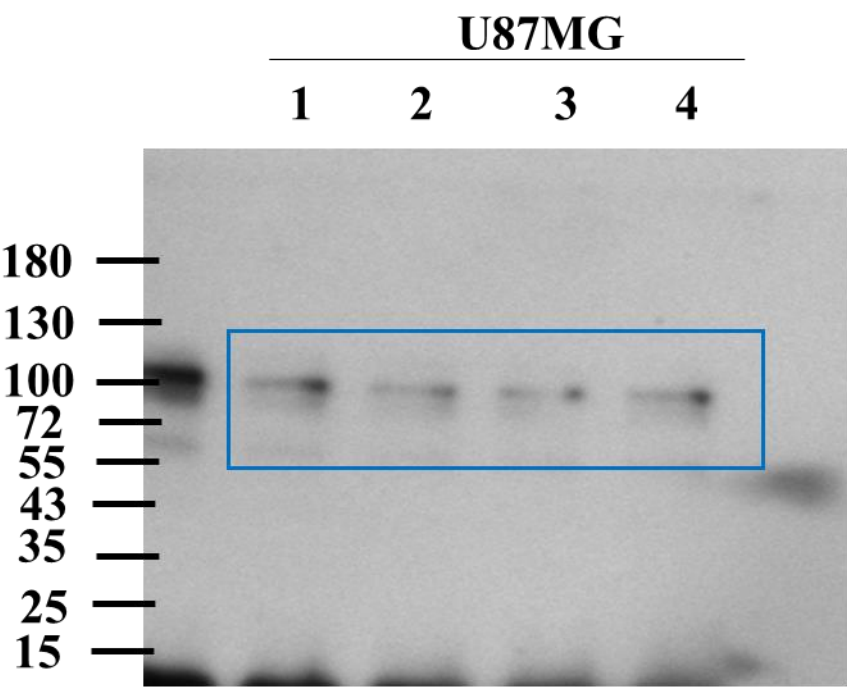

1 : 0.84 : 0.99 : 1.12

Anti-P62

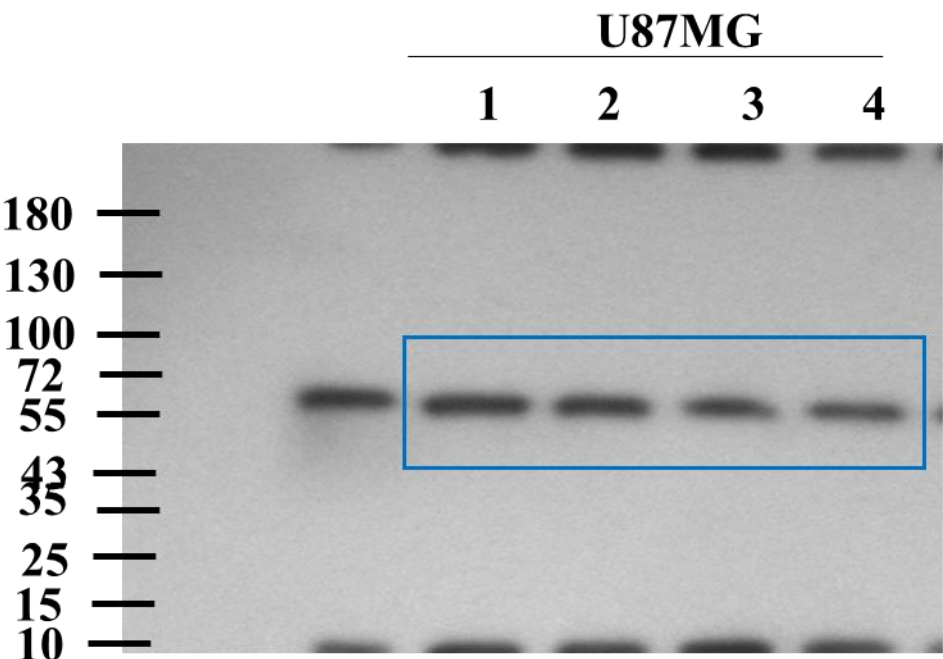

1 : 0.93 : 0.86 : 0.87

Related to Fig.4B-3

Anti-P62

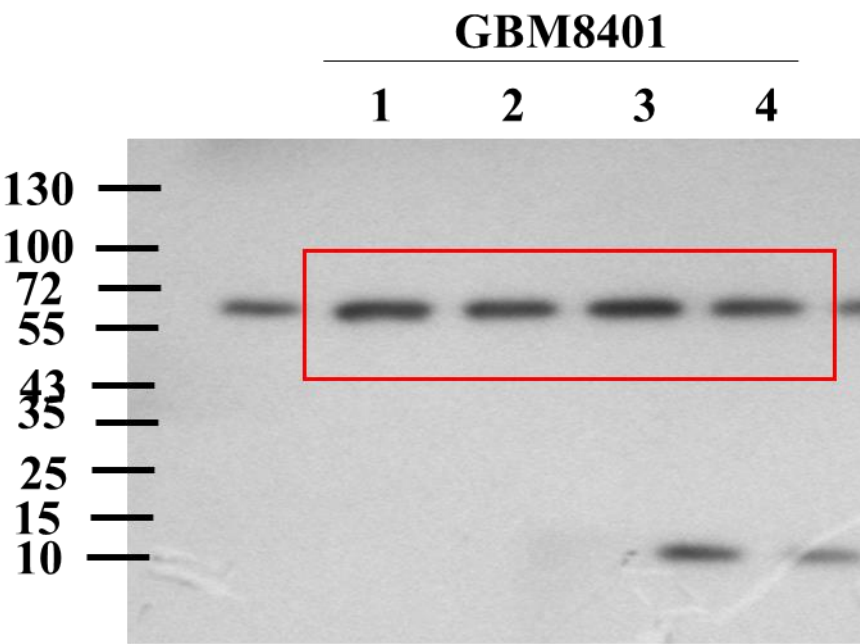

1 : 0.96 : 1.06 : 0.98

Anti-GAPDH

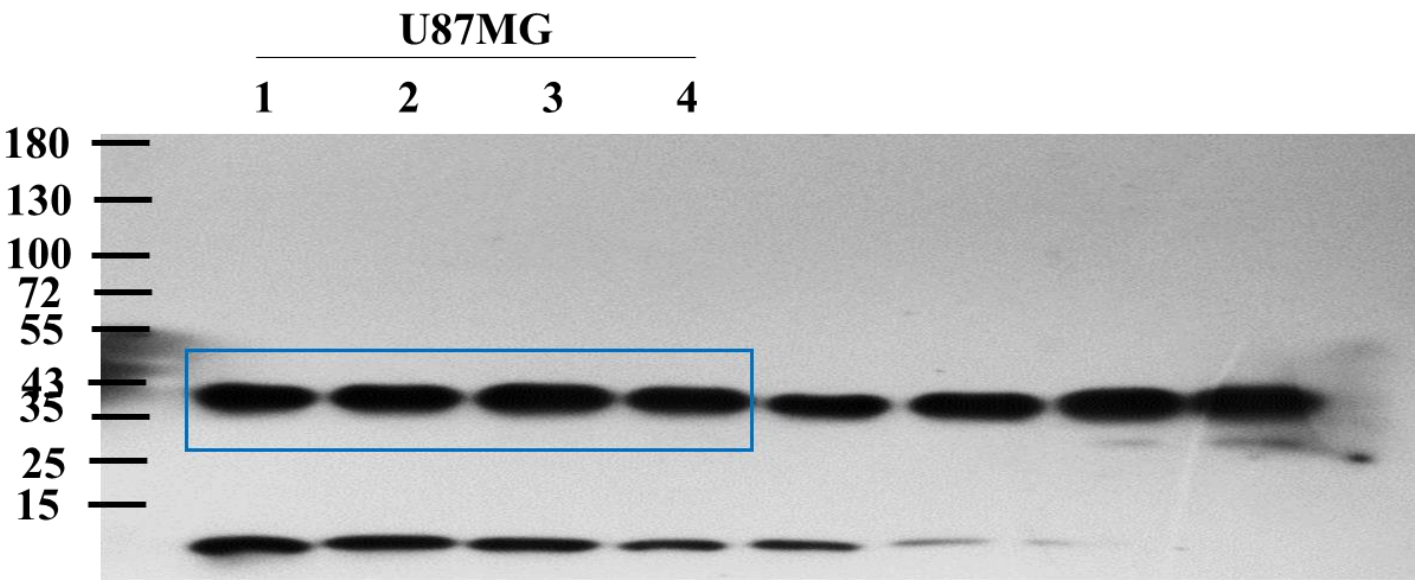

1 : 1.01 : 1.04 : 1.01

Anti- GAPDH

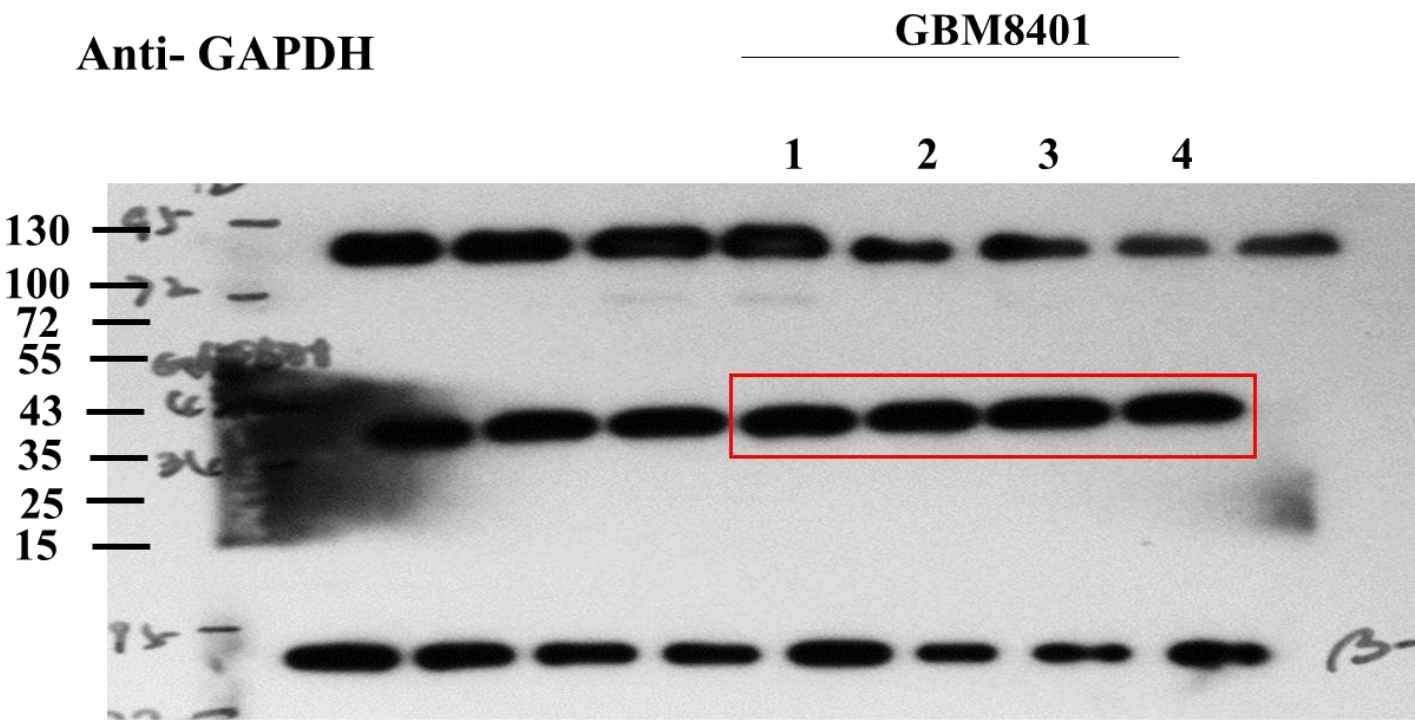

1 : 0.99 : 1.04 : 1.00



Related to Fig.5-1

Anti-P62

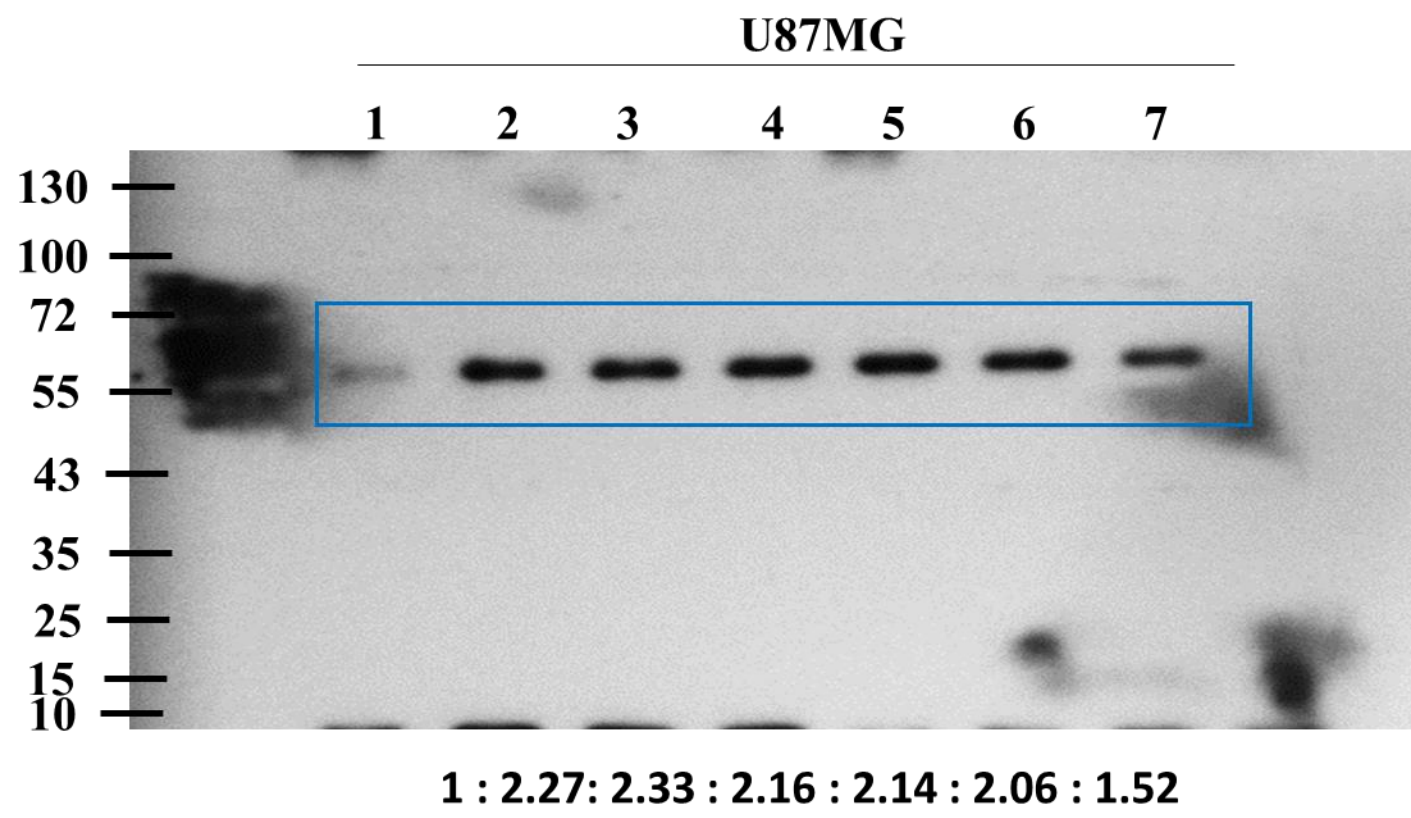

Anti-LC3I/II

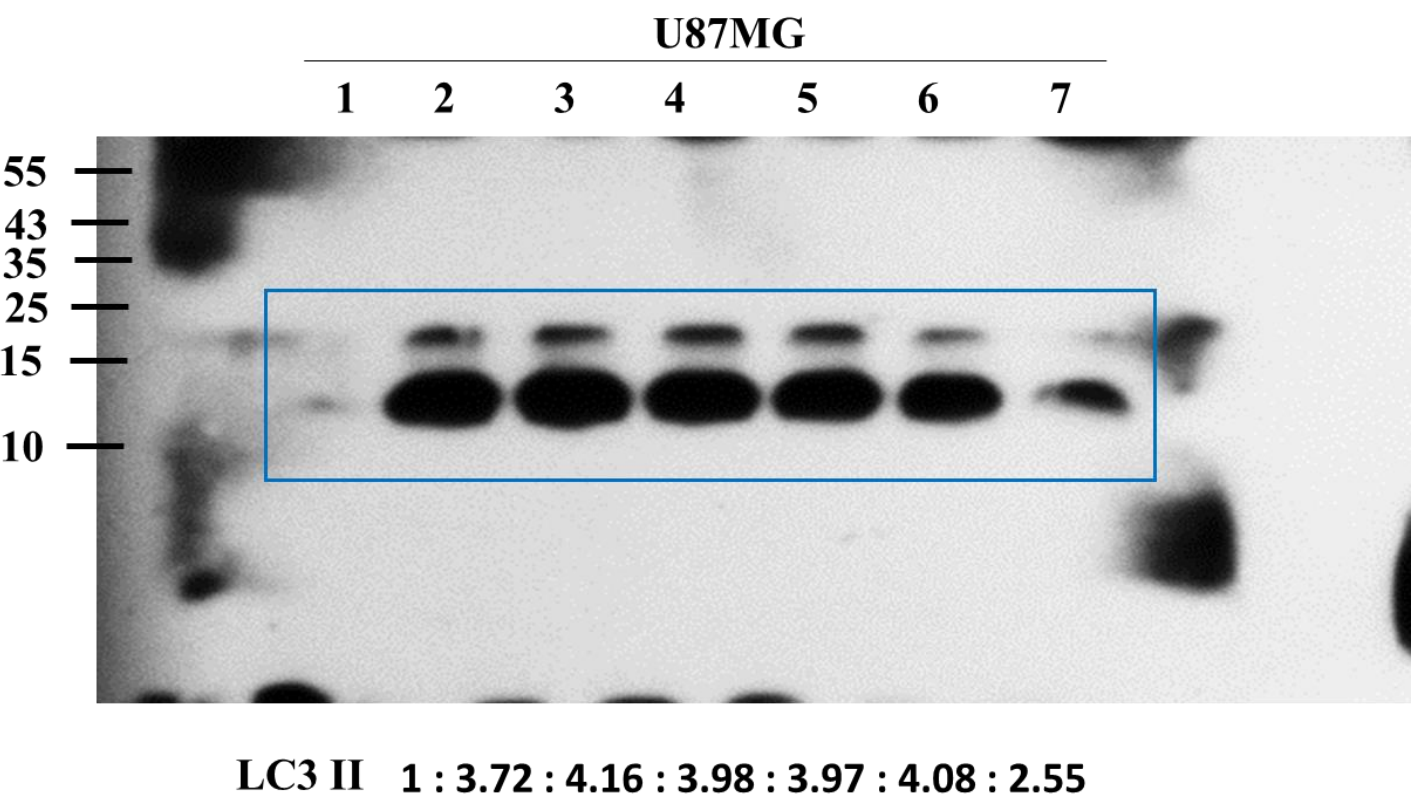

Related to Fig.5-2

Anti-Nestin

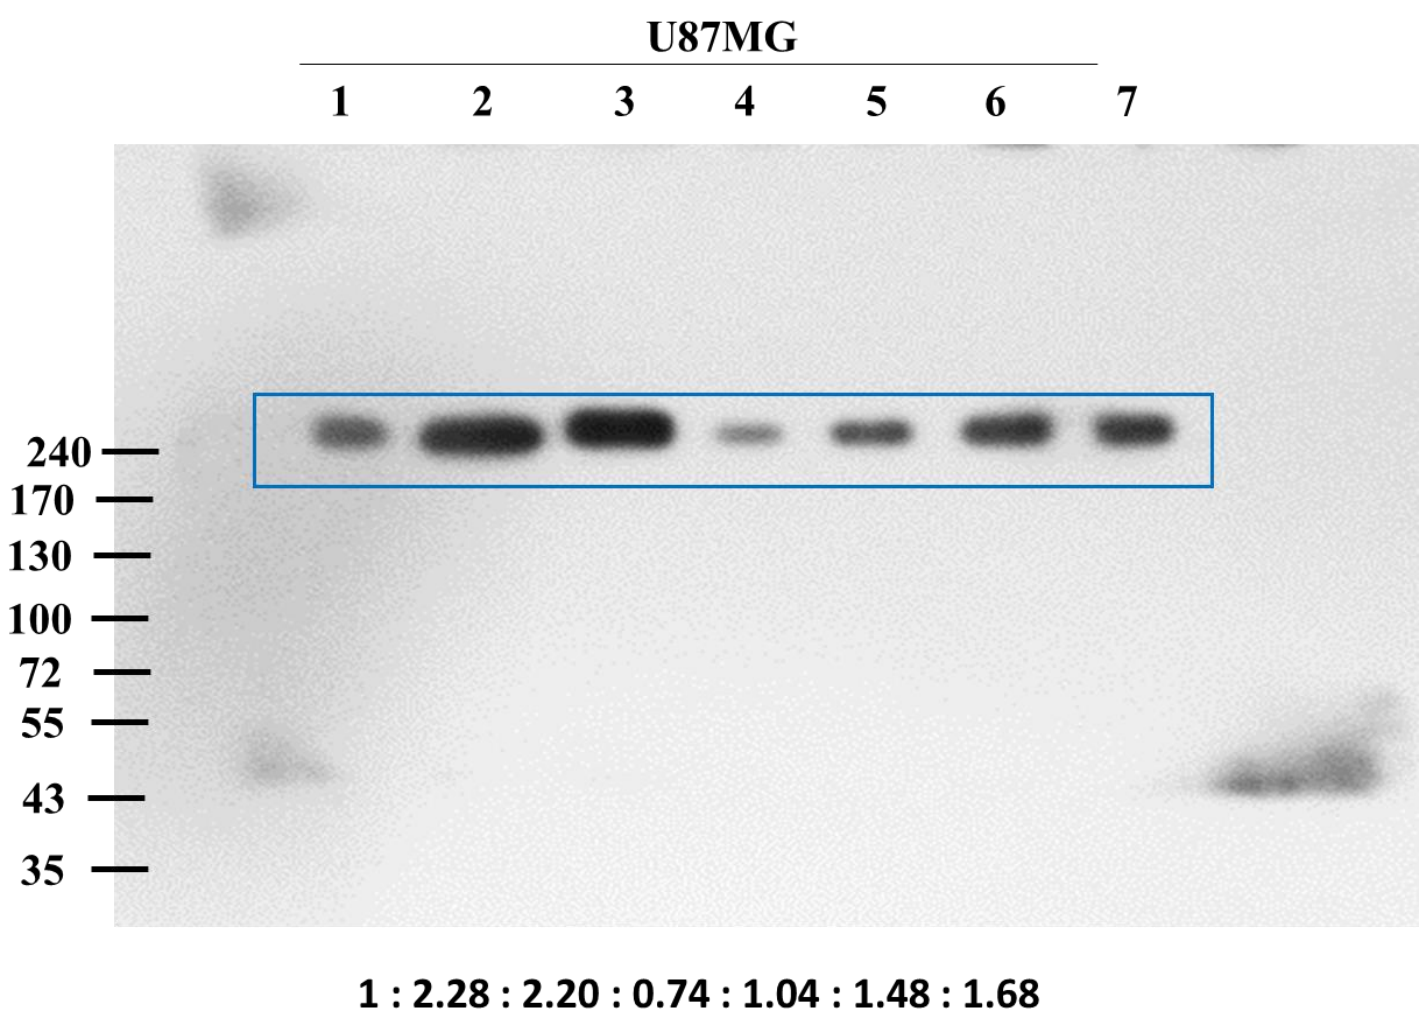

Anti-CD44

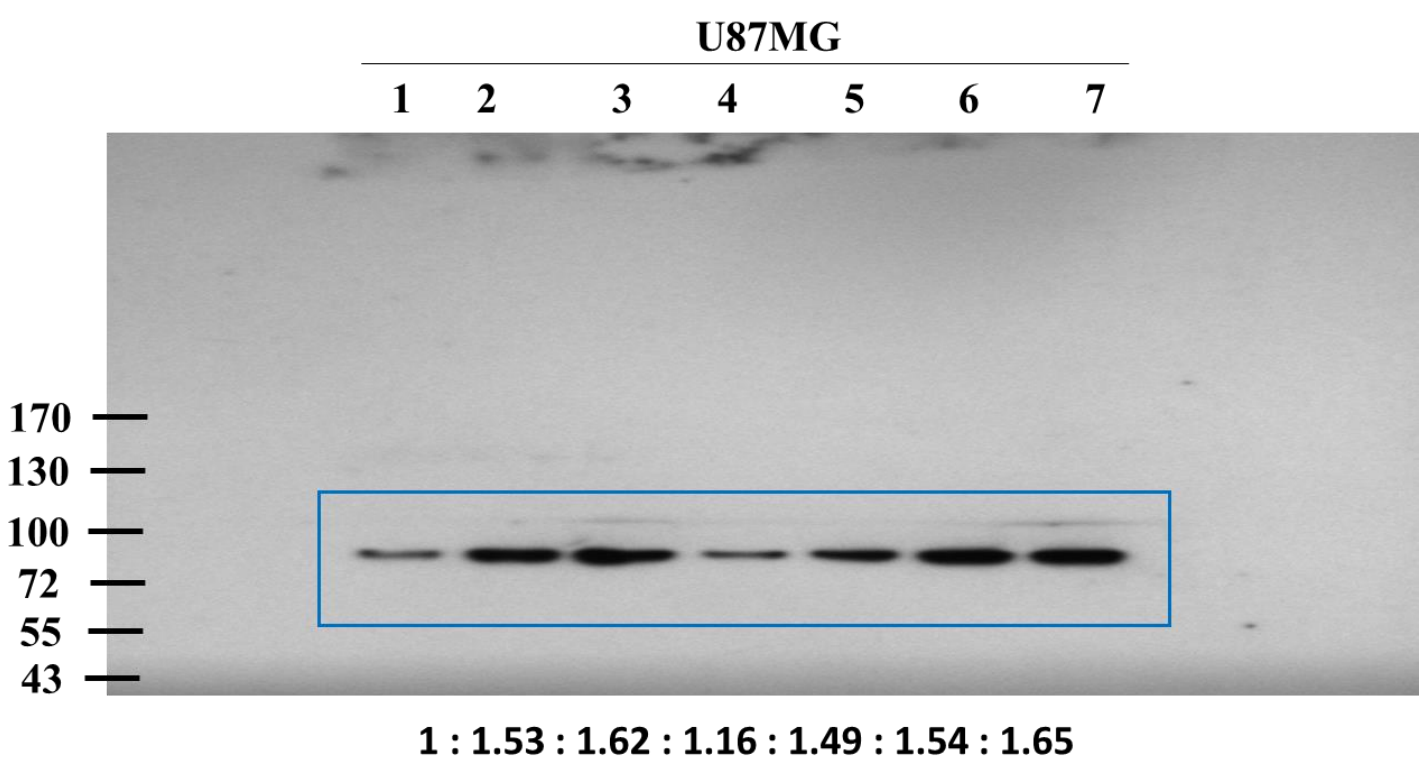

Related to Fig.5-3

Anti-CD133

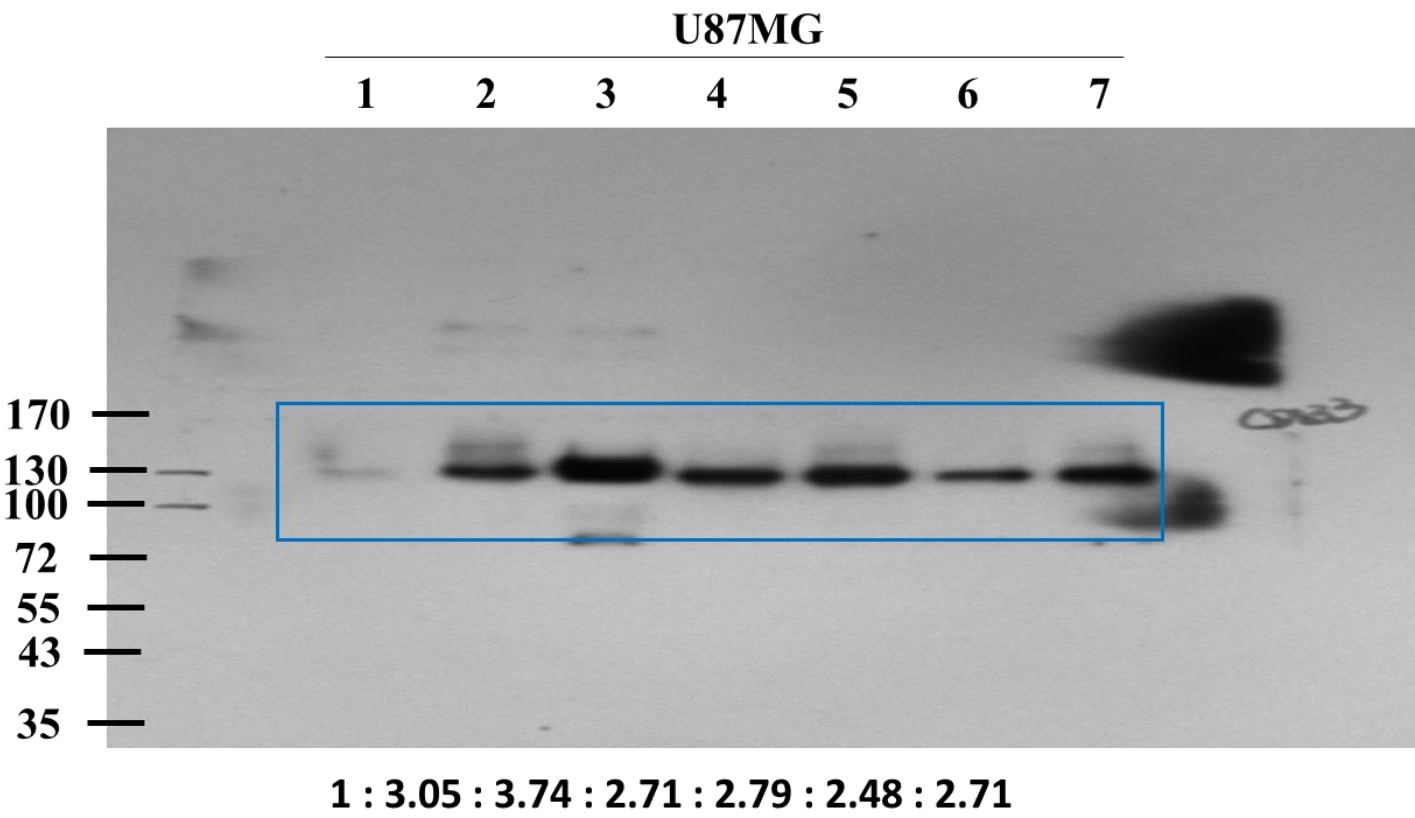

Anti-SOX2

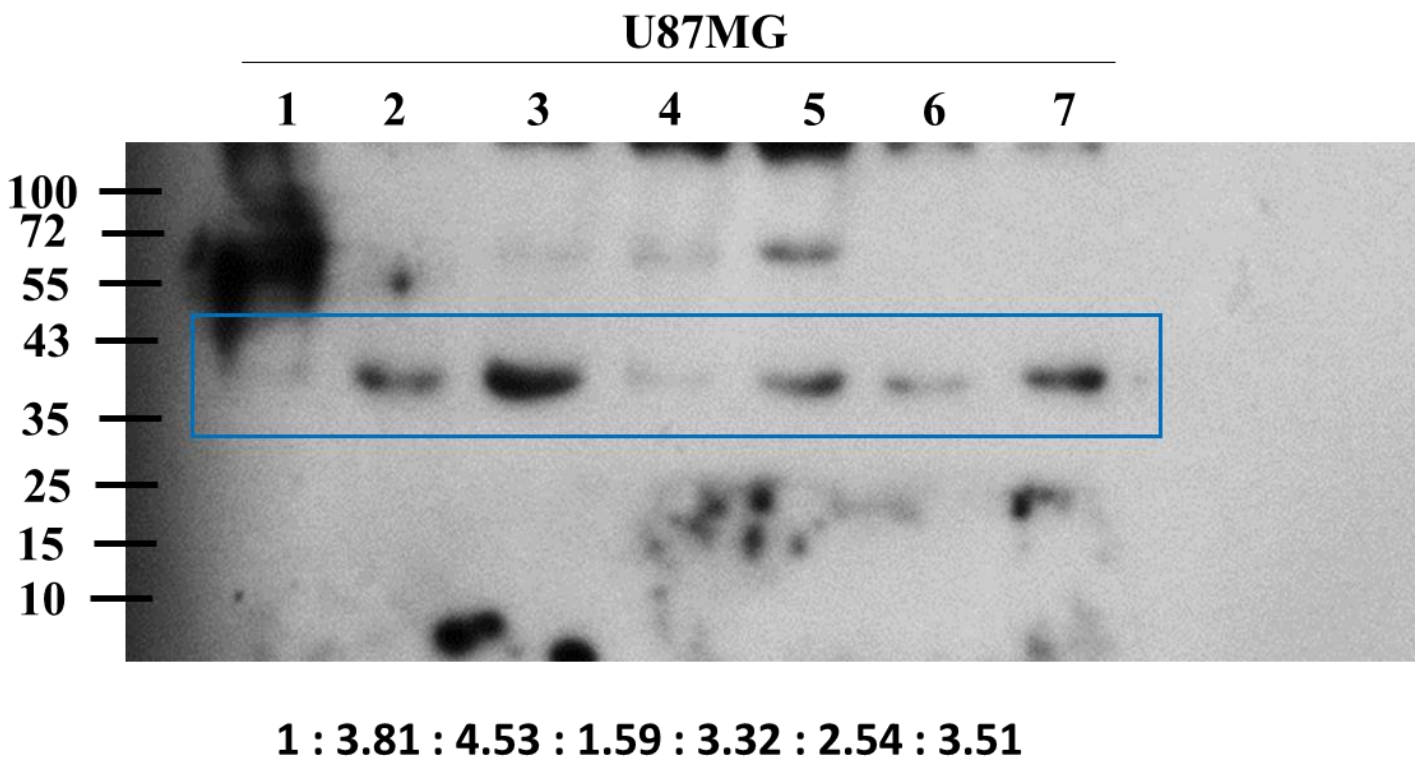



Related to Fig.5-4

Anti-GAPDH

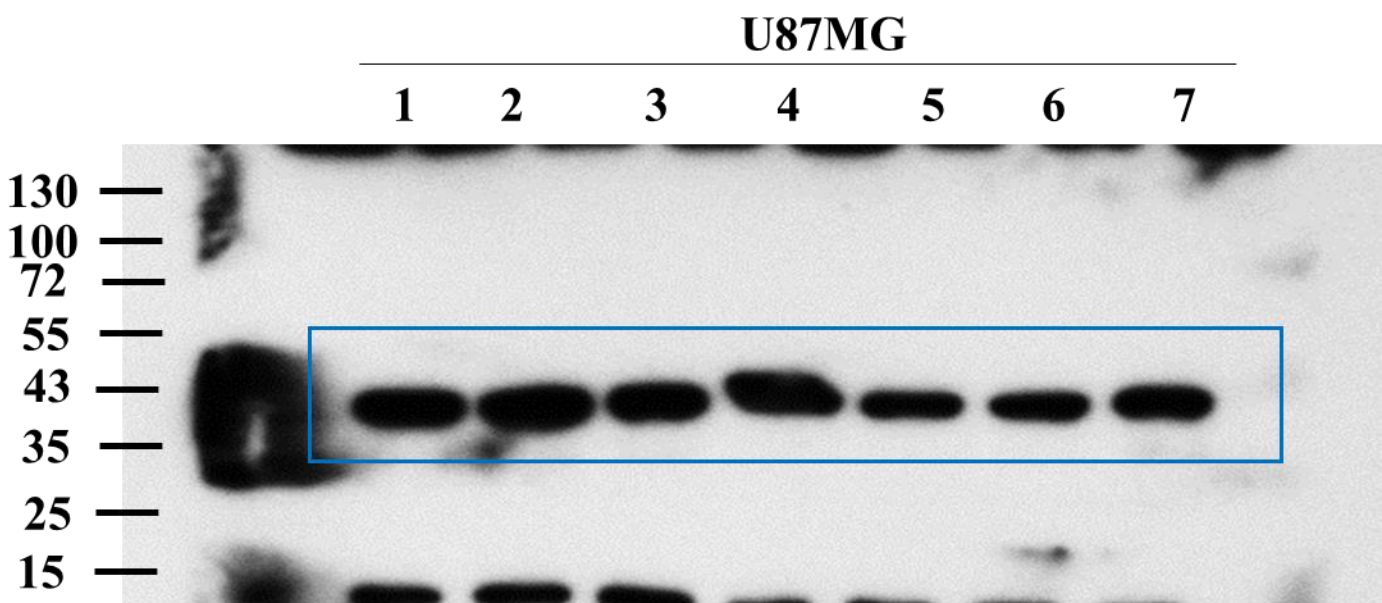

1 : 1 : 0.97 : 0.96 : 0.83 : 0.88 : 1.02

Anti-P62

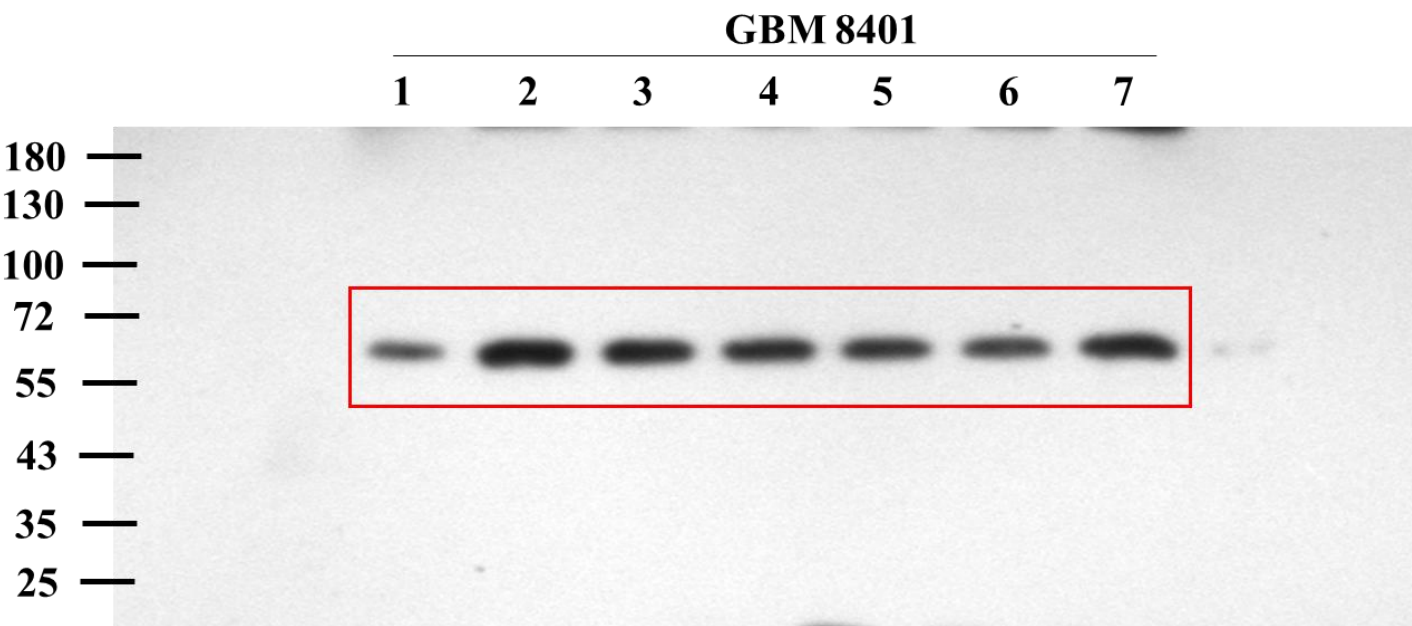

1 : 2.76 : 2.15 : 1.87 : 2.00 : 2.02 : 2.14

Related to Fig.5-5

Anti-LC3I/II

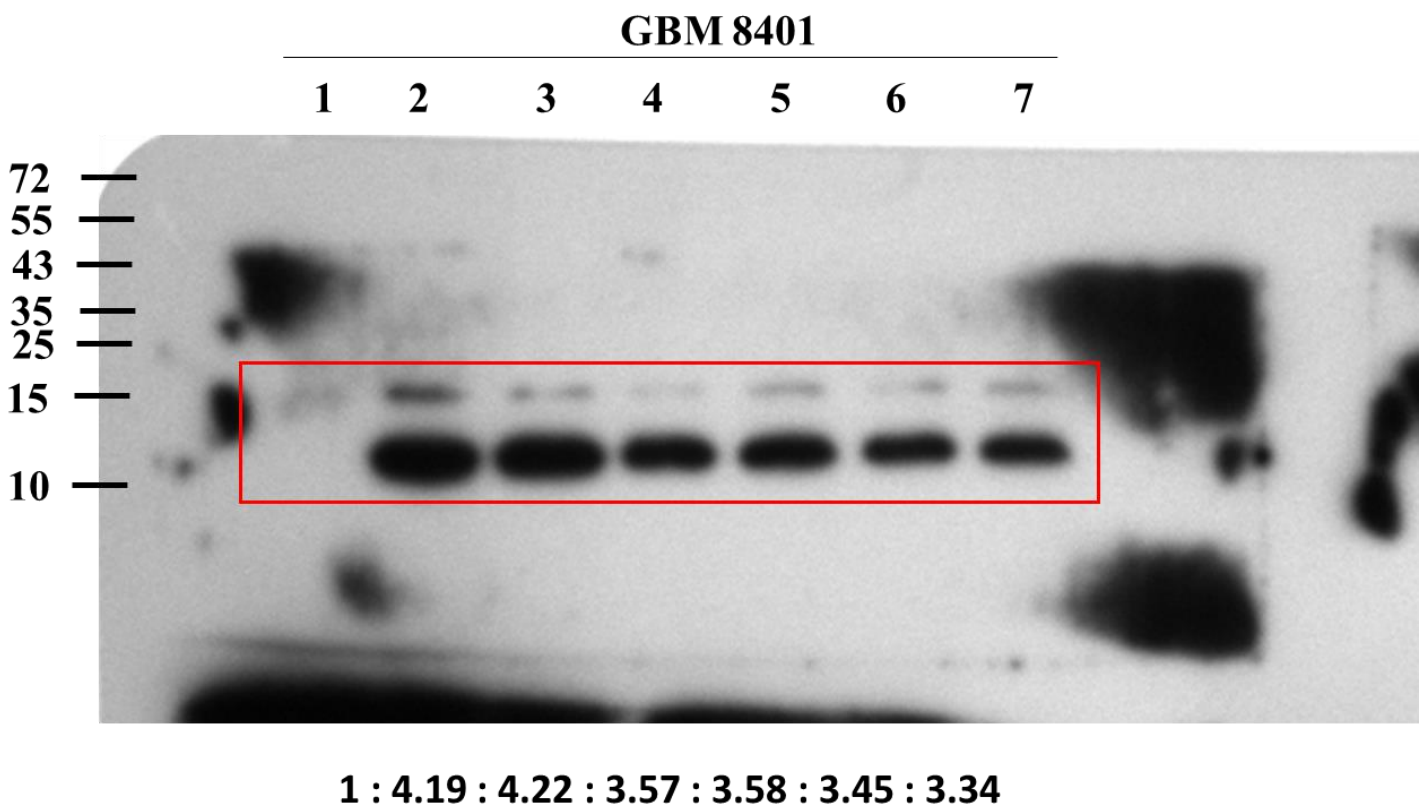

Anti-Nestin

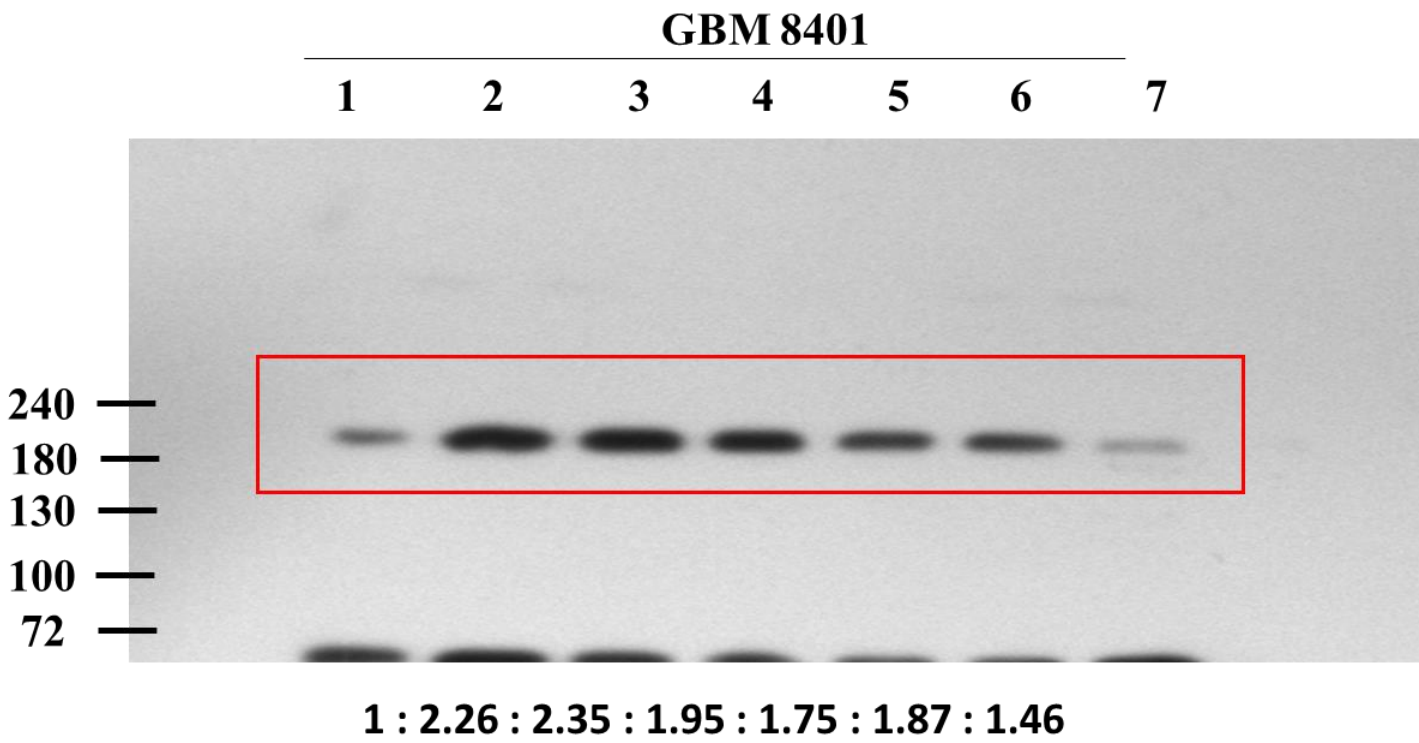

Related to Fig.5-6

Anti-CD44

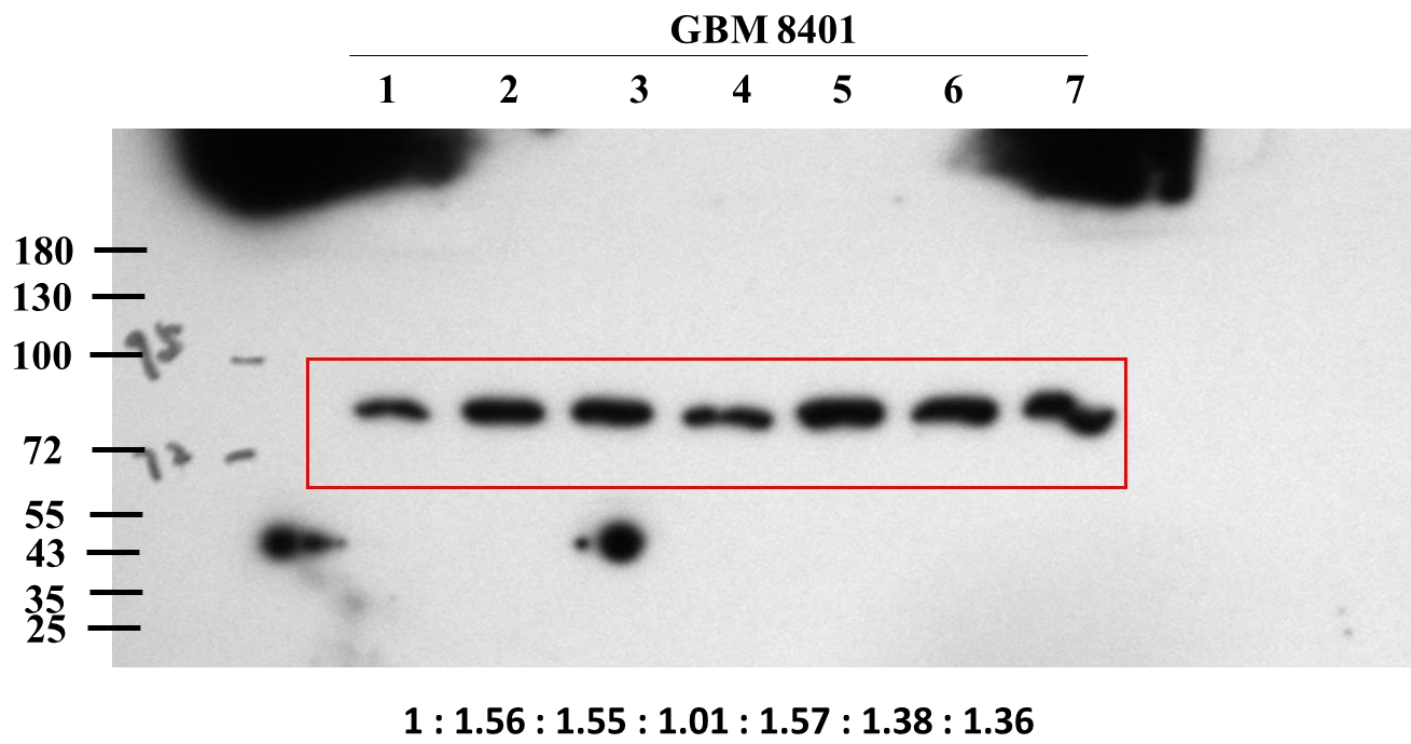

Anti-CD133

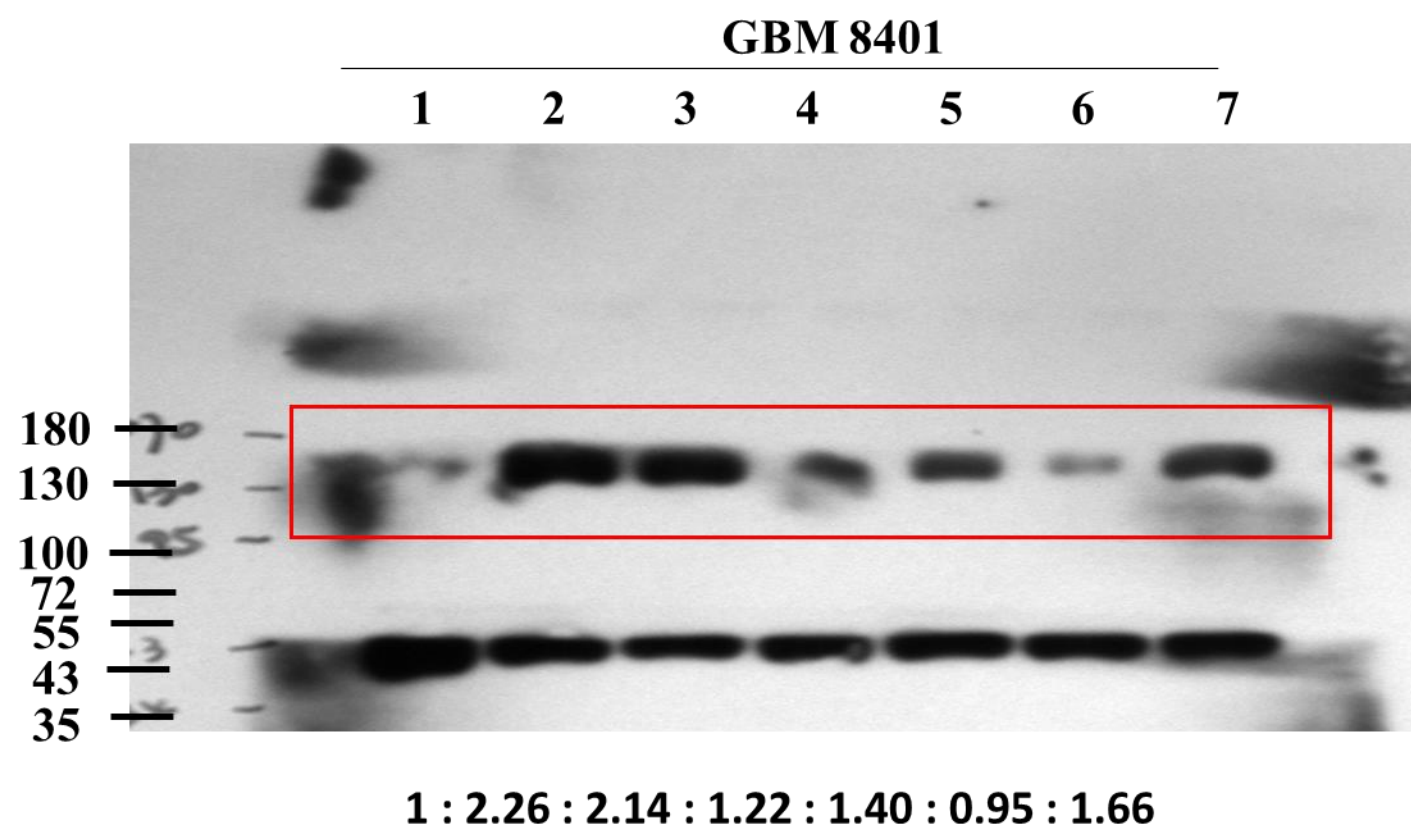



Related to Fig.5-7

Anti-SOX2

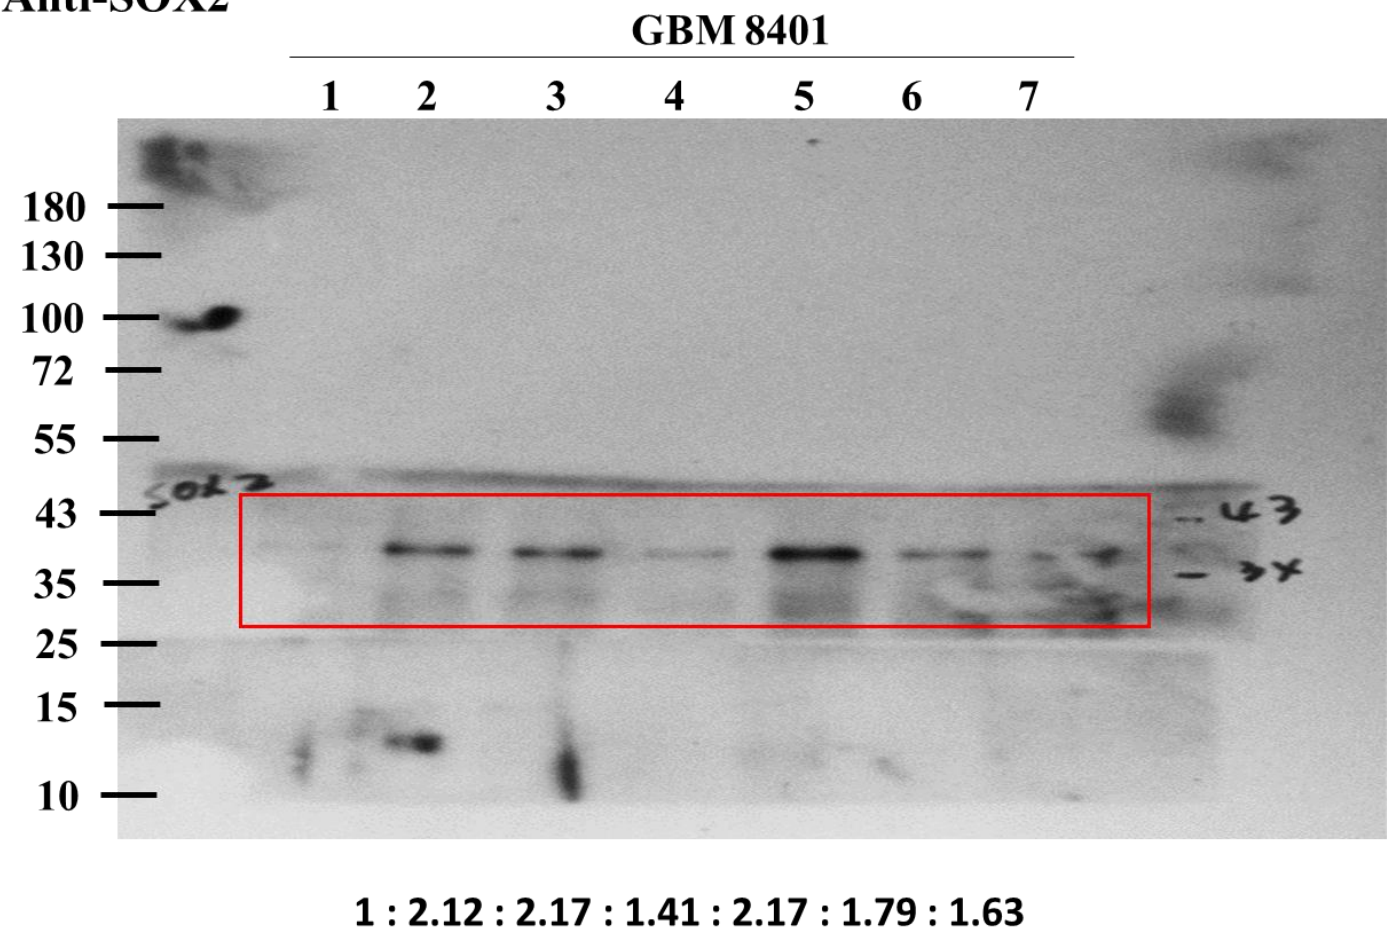

Anti-GAPDH

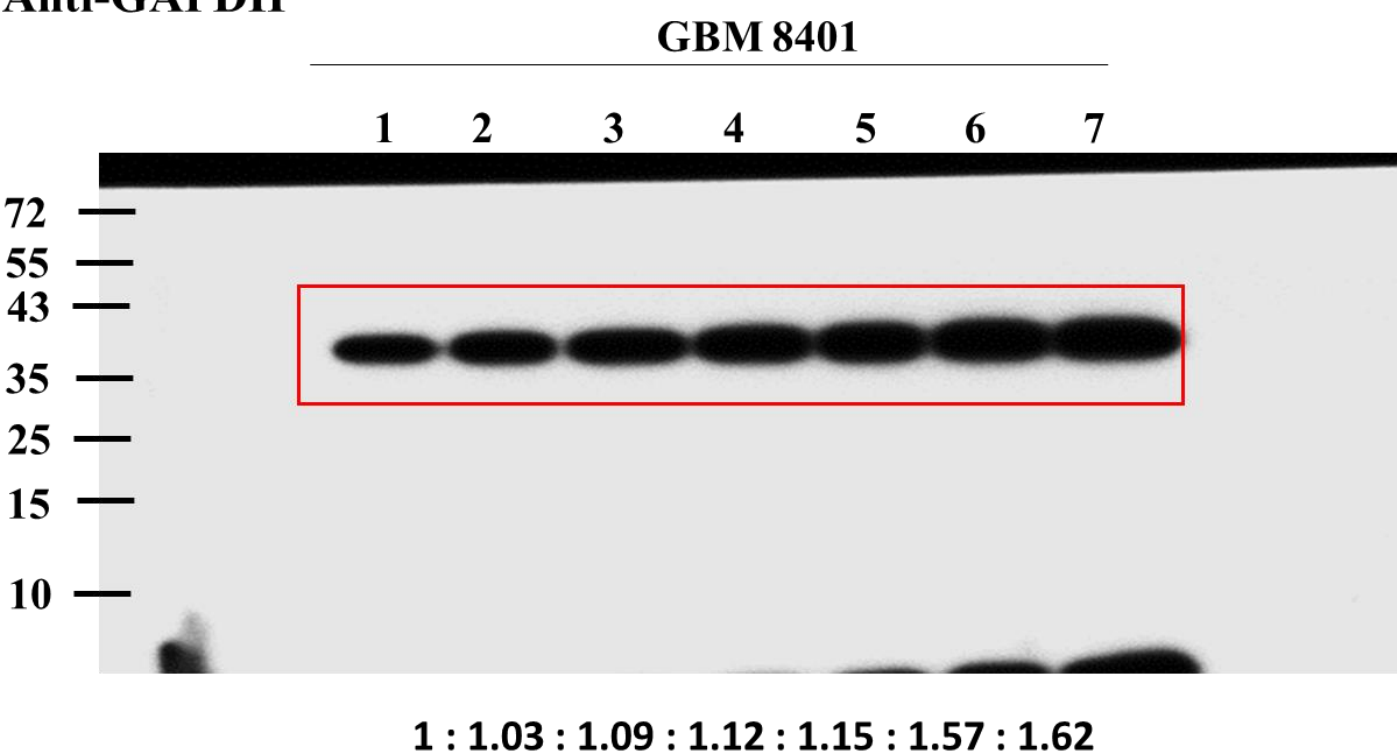

Supplement Figure 2-1.

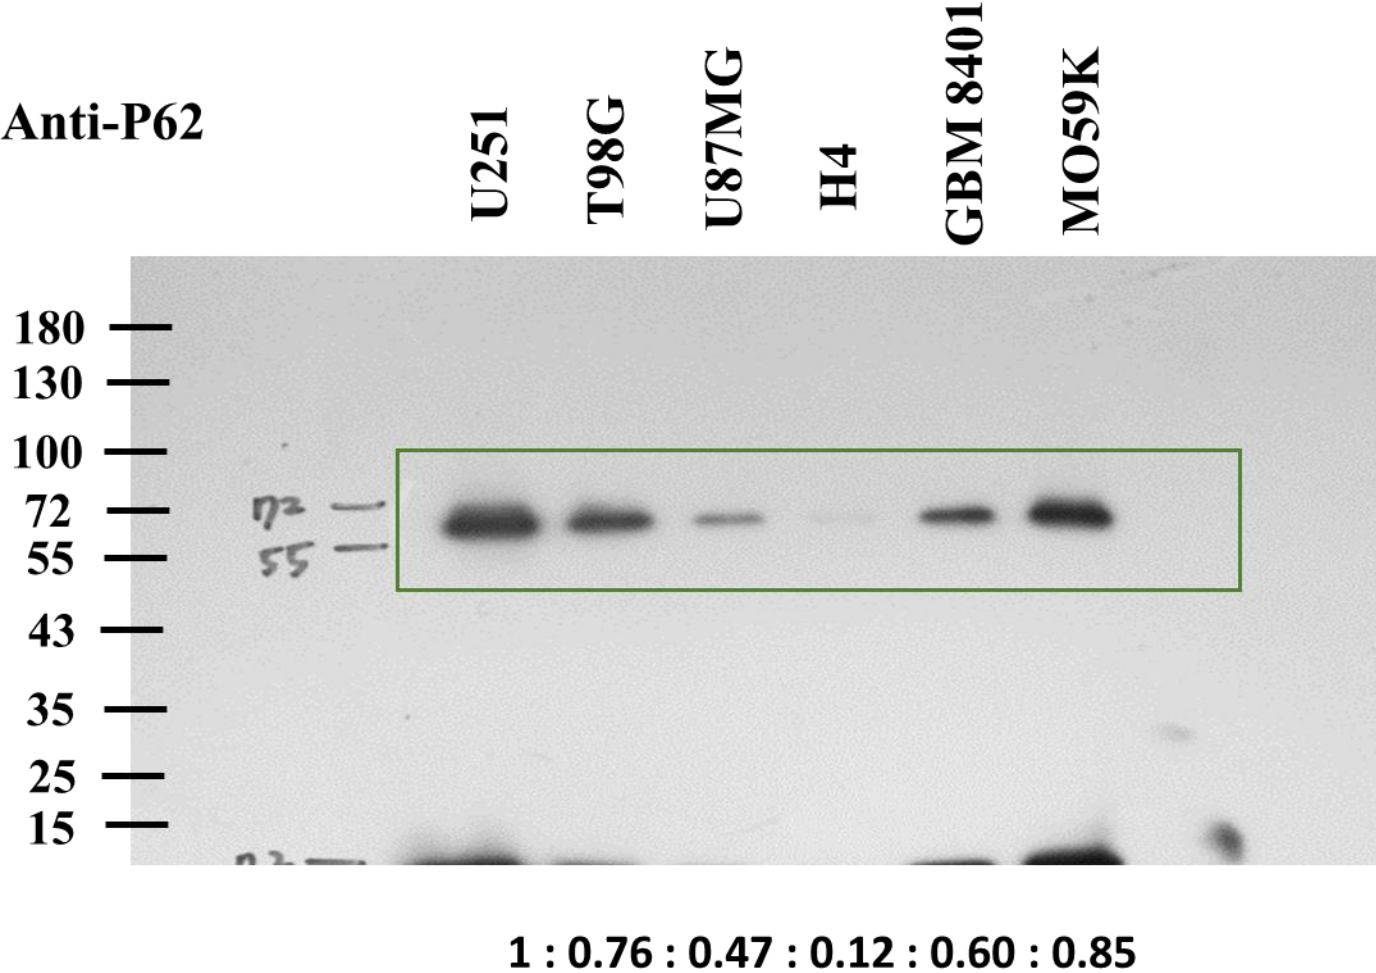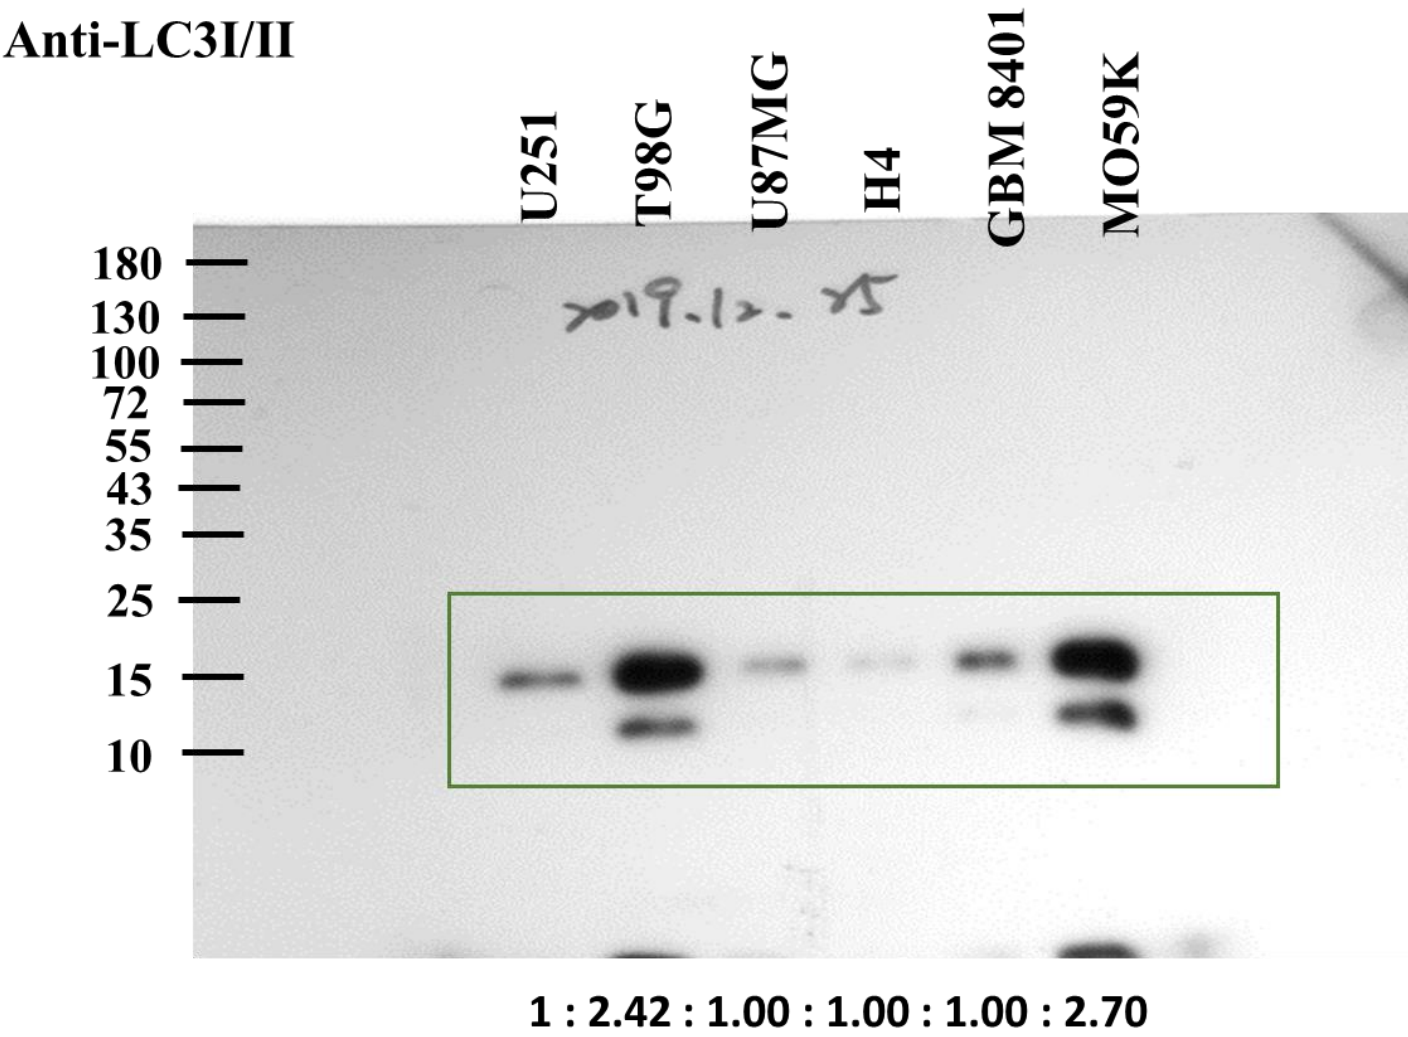

Supplement Figure 2-2.

Anti-GAPDH

U251      T98G      U87MG      H4      GBM 8401      MO59K

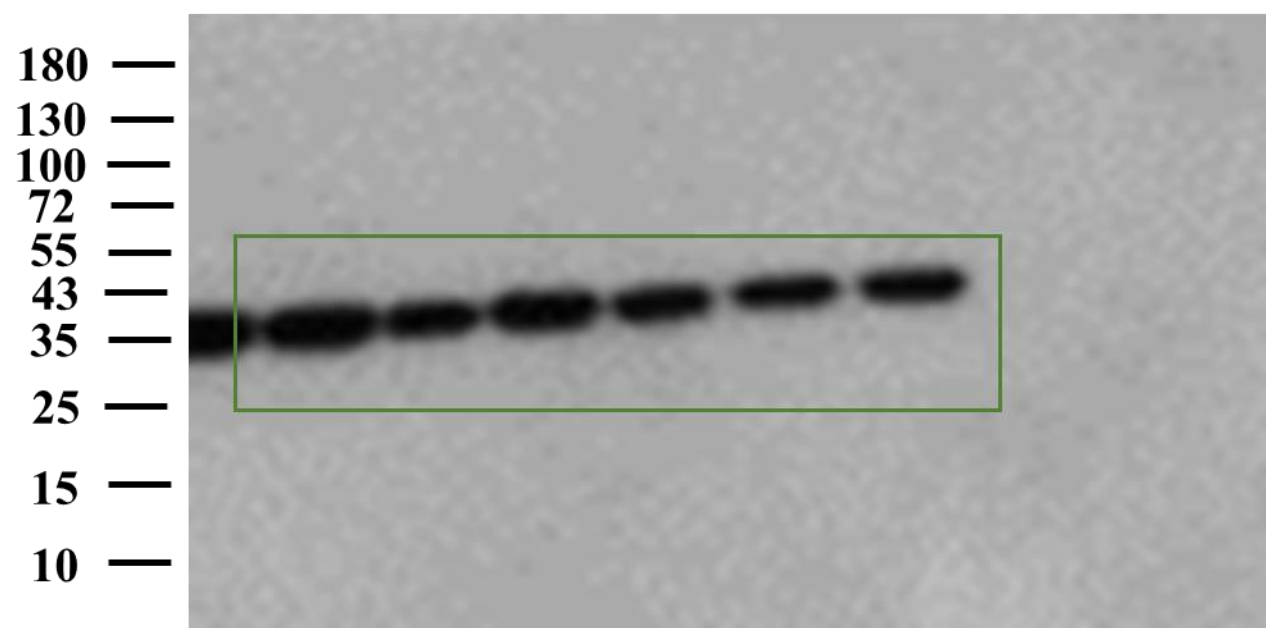

1 : 0.88 : 0.95 : 0.87 : 0.82 : 0.83
